# Supplementary material for: Density and Absolute Salinity of the Baltic Sea 2006–2009
Source: Copernicus journal article supplement (doi:10.5194/os-6-3-2010), 2010-01-18
Supplement: Supplementary file 1 [file os-6-3-2010-supplement.zip]

# Density Measurement of Standard Seawater with a Densitometer DMA 5000 at 20°C

| Date of<br>measurment. | Batch<br>P-Ser. | Density g/cm <sup>3</sup><br>Meanvalue | Density g/cm <sup>3</sup><br>Standarddev. | Pract.Salinity<br>(Label) | δSA mg/kg |
|------------------------|-----------------|----------------------------------------|-------------------------------------------|---------------------------|-----------|
| 19.07.2006             | P145            | 1,0247543                              | 0,0000012                                 | 34,9925                   | -2,22     |
| 20.07.2006             | P145            | 1,0247547                              | 0,0000000                                 | 34,9925                   | -1,77     |
| 21.07.2006             | P145            | 1,0247530                              | 0,0000010                                 | 34,9925                   | -3,96     |
| 22.07.2006             | P145            | 1,0247515                              | 0,0000015                                 | 34,9925                   | -5,92     |
| 23.07.2006             | P145            | 1,0247525                              | 0,0000008                                 | 34,9925                   | -4,61     |
| 24.07.2006             | P145            | 1,0247545                              | 0,0000012                                 | 34,9925                   | -1,99     |
| 25.07.2006             | P145            | 1,0247543                              | 0,0000011                                 | 34,9925                   | -2,21     |
| 26.07.2006             | P145            | 1,0247515                              | 0,0000008                                 | 34,9925                   | -5,92     |
| 14.08.2006             | P145            | 1,0247538                              | 0,0000005                                 | 34,9925                   | -2,89     |
| 15.08.2006             | P145            | 1,0247542                              | 0,0000014                                 | 34,9925                   | -2,45     |
| 23.08.2006             | P145            | 1,0247590                              | 0,0000013                                 | 34,9925                   | 3,90      |
| 14.09.2006             | P145            | 1,0247553                              | 0,0000018                                 | 34,9925                   | -0,91     |
| 15.09.2006             | P145            | 1,0247550                              | 0,0000015                                 | 34,9925                   | -1,35     |
| 18.09.2006             | P145            | 1,0247533                              | 0,0000008                                 | 34,9925                   | -3,53     |
| 23.10.2006             | P145            | 1,0247533                              | 0,0000013                                 | 34,9925                   | -3,54     |
| 25.10.2006             | P145            | 1,0247528                              | 0,0000008                                 | 34,9925                   | -4,20     |
| 26.10.2006             | P147            | 1,0247542                              | 0,0000008                                 | 34,9929                   | -2,84     |
| 07.11.2006             | P144            | 1,0247542                              | 0,0000014                                 | 34,9949                   | -4,80     |
| 08.11.2006             | P144            | 1,0247535                              | 0,0000015                                 | 34,9949                   | -5,68     |
| 09.11.2006             | P144            | 1,0247557                              | 0,0000022                                 | 34,9949                   | -2,84     |
| 10.11.2006             | P144            | 1,0247567                              | 0,0000012                                 | 34,9949                   | -1,53     |
| 11.11.2006             | P144            | 1,0247568                              | 0,0000010                                 | 34,9949                   | -1,31     |
| 13.11.2006             | P147            | 1,0247530                              | 0,0000015                                 | 34,9929                   | -4,36     |
| 15.11.2006             | P147            | 1,0247472                              | 0,0000019                                 | 34,9929                   | -12,01    |
| 16.02.2007             | P144            | 1,0247558                              | 0,0000006                                 | 34,9949                   | -2,63     |
| 26.03.2007             | P147            | 1,0247530                              | 0,0000010                                 | 34,9929                   | -4,37     |
| 02.04.2007             | P147            | 1,0247520                              | 0,0000005                                 | 34,9929                   | -5,68     |
| 04.04.2007             | P147            | 1,0247500                              | 0,0000008                                 | 34,9929                   | -8,31     |
| 10.04.2007             | P147            | 1,0247517                              | 0,0000006                                 | 34,9929                   | -6,12     |
| 23.04.2007             | P147            | 1,0247538                              | 0,0000008                                 | 34,9929                   | -3,39     |
| 08.05.2007             | P148            | 1,0247530                              | 0,0000012                                 | 34,9929                   | -4,37     |
| 14.05.2007             | P148            | 1,0247522                              | 0,0000008                                 | 34,9929                   | -5,46     |
| 13.06.2007             | P148            | 1,0247500                              | 0,0000005                                 | 34,9929                   | -8,31     |
| 14.06.2007             | P148            | 1,0247523                              | 0,0000012                                 | 34,9929                   | -5,25     |
| 15.06.2007             | P148            | 1,0247533                              | 0,0000006                                 | 34,9929                   | -3,94     |
| 18.06.2007             | P148            | 1,0247517                              | 0,0000006                                 | 34,9929                   | -6,12     |
| 19.06.2007             | P148            | 1,0247507                              | 0,0000010                                 | 34,9929                   | -7,43     |
| 28.06.2007             | P148            | 1,0247540                              | 0,0000006                                 | 34,9929                   | -3,06     |
| 27.10.2007             | P148            | 1,0247528                              | 0,0000007                                 | 34,9929                   | -4,70     |
| 29.10.2007             | P148            | 1,0247522                              | 0,0000008                                 | 34,9929                   | -5,46     |
| 30.10.2007             | P148            | 1,0247517                              | 0,0000010                                 | 34,9929                   | -6,12     |
| 31.10.2007             | P148            | 1,0247539                              | 0,0000014                                 | 34,9929                   | -3,19     |
| 02.11.2007             | P148            | 1,0247528                              | 0,0000006                                 | 34,9929                   | -4,59     |
| 06.11.2007             | P148            | 1,0247533                              | 0,0000008                                 | 34,9929                   | -3,94     |
| 07.11.2007             | P148            | 1,0247537                              | 0,0000010                                 | 34,9929                   | -3,50     |
| 12.11.2007             | P148            | 1,0247542                              | 0,0000010                                 | 34,9929                   | -2,84     |
| 14.11.2007             | P148            | 1,0247540                              | 0,0000008                                 | 34,9929                   | -3,06     |
| 19.02.2008             | P148            | 1,0247548                              | 0,0000008                                 | 34,9929                   | -1,97     |
| 20.02.2008             | P148            | 1,0247540                              | 0,0000009                                 | 34,9929                   | -3,06     |

|                   |       |           |           |         |       |
|-------------------|-------|-----------|-----------|---------|-------|
| 21.02.2008        | P148  | 1,0247537 | 0,0000006 | 34,9929 | -3,50 |
| 22.02.2008        | P148  | 1,0247530 | 0,0000005 | 34,9929 | -4,37 |
| 24.02.2008        | P148  | 1,0247533 | 0,0000010 | 34,9929 | -4,04 |
| 26.02.2008        | P148  | 1,0247508 | 0,0000010 | 34,9929 | -7,21 |
| 01.03.2008        | P148  | 1,0247507 | 0,0000011 | 34,9929 | -7,43 |
| 02.03.2008        | P148  | 1,0247518 | 0,0000005 | 34,9929 | -5,90 |
| 04.03.2008        | P148  | 1,0247518 | 0,0000008 | 34,9929 | -5,90 |
| 14.04.2008        | P148  | 1,0247527 | 0,0000008 | 34,9929 | -4,81 |
| 14.05.2008        | P148  | 1,0247527 | 0,0000011 | 34,9929 | -4,72 |
| 23.07.2008        | P148  | 1,0247527 | 0,0000014 | 34,9929 | -4,81 |
| 14.08.2008        | P148  | 1,0247523 | 0,0000000 | 34,9929 | -5,36 |
| 18.08.2008        | P148  | 1,0247523 | 0,0000005 | 34,9929 | -5,25 |
| 28.08.2008        | P148  | 1,0247547 | 0,0000012 | 34,9929 | -2,19 |
| 29.08.2008        | P148  | 1,0247520 | 0,0000005 | 34,9929 | -5,68 |
| 16.11.2008        | P148  | 1,0247555 | 0,0000010 | 34,9929 | -1,10 |
| 17.11.2008        | P148  | 1,0247533 | 0,0000015 | 34,9929 | -3,94 |
| 18.11.2008        | P148  | 1,0247520 | 0,0000012 | 34,9929 | -5,68 |
| 22.11.2008        | P148  | 1,0247523 | 0,0000010 | 34,9929 | -5,25 |
| 25.11.2008        | P148  | 1,0247518 | 0,0000013 | 34,9929 | -5,90 |
| 03.12.2008        | P148  | 1,0247543 | 0,0000012 | 34,9929 | -2,62 |
| 27.01.2009        | P148  | 1,0247537 | 0,0000011 | 34,9929 | -3,50 |
| 03.02.2009        | P148  | 1,0247533 | 0,0000014 | 34,9929 | -3,94 |
| 12.02.2009        | P148  | 1,0247528 | 0,0000012 | 34,9929 | -4,59 |
| 16.02.2009        | P148  | 1,0247543 | 0,0000008 | 34,9929 | -2,62 |
| 17.02.2009        | P148  | 1,0247542 | 0,0000008 | 34,9929 | -2,84 |
| 24.02.2009        | P148  | 1,0247533 | 0,0000024 | 34,9929 | -3,94 |
| 16.04.2009        | P149  | 1,0247528 | 0,0000010 | 34,9937 | -5,38 |
| 30.06.2009        | P149  | 1,0247546 | 0,0000010 | 34,9937 | -3,08 |
| 01.07.2009        | P149  | 1,0247528 | 0,0000008 | 34,9937 | -5,38 |
| <b>10L-Series</b> |       |           |           |         |       |
| 17.11.2008        | 10L10 | 1,0057372 | 0,0000016 | 9,9265  | 1,50  |
| 22.11.2008        | 10L10 | 1,0057372 | 0,0000021 | 9,9265  | 1,50  |
| 16.11.2008        | 10L10 | 1,0057390 | 0,0000010 | 9,9265  | 3,92  |
| 25.11.2008        | 10L10 | 1,0057372 | 0,0000014 | 9,9265  | 1,50  |
| 13.06.2007        | 10L9  | 1,0058102 | 0,0000012 | 10,0247 | -0,19 |
| 14.06.2007        | 10L9  | 1,0058128 | 0,0000010 | 10,0247 | 3,34  |
| 15.06.2007        | 10L9  | 1,0058117 | 0,0000006 | 10,0247 | 1,80  |
| 18.06.2007        | 10L9  | 1,0058123 | 0,0000010 | 10,0247 | 2,68  |
| 19.06.2007        | 10L10 | 1,0057350 | 0,0000005 | 9,9265  | -1,37 |
| 20.06.2007        | 10L10 | 1,0057353 | 0,0000012 | 9,9265  | -0,93 |
