# Supplementary material for: Density and Absolute Salinity of the Baltic Sea 2006–2009
Source: Copernicus journal article supplement (doi:10.5194/os-6-3-2010), 2010-01-18
Supplement: Supplementary file 2 [file os-6-3-2010-supplement.zip]

## Measurements of the Properties of Baltic Seawater 2006 - 2009

| Date    | Depth | Density<br>mean val. | Density<br>Std.Dev. | Temp.<br>Dens. | Practical<br>Salinity | Station<br>Name | Position     |              |               |               |    | δS <sub>A</sub> | Total P             | Total N             | Silicate            | Phosphate           | Nitrite             | Nitrate             | Ammonium            | CT      | AT      |
|---------|-------|----------------------|---------------------|----------------|-----------------------|-----------------|--------------|--------------|---------------|---------------|----|-----------------|---------------------|---------------------|---------------------|---------------------|---------------------|---------------------|---------------------|---------|---------|
|         | m     | g/cm <sup>3</sup>    | g/cm <sup>3</sup>   | °C             |                       |                 | Lat.<br>Deg. | Lat.<br>Min. | Long.<br>Deg. | Long.<br>Min. | Qu | mg/kg           | mmol/m <sup>3</sup> | μmol/kg | μmol/kg |
| 19.7.06 | 1     | 1,0040107            | 0,0000005           | 20             | 7,5762                | TF0002          | 54           | 39           | 12            | 27            | 1  | 70,3            |                     |                     |                     |                     |                     |                     |                     |         |         |
| 19.7.06 | 1     | 1,0040075            | 0,0000006           | 20             | 7,5742                | TF0002          | 54           | 39           | 12            | 27            | 1  | 68,1            |                     |                     |                     |                     |                     |                     |                     |         |         |
| 19.7.06 | 1     | 1,0040150            | 0,0000008           | 20             | 7,5805                | TF0002          | 54           | 39           | 12            | 27            | 1  | 71,7            |                     |                     |                     |                     |                     |                     |                     |         |         |
| 19.7.06 | 1     | 1,0040070            | 0,0000012           | 20             | 7,5772                | TF0002          | 54           | 39           | 12            | 27            | 1  | 64,5            |                     |                     |                     |                     |                     |                     |                     |         |         |
| 19.7.06 | 1     | 1,0040110            | 0,0000012           | 20             | 7,5760                | TF0002          | 54           | 39           | 12            | 27            | 1  | 70,9            |                     |                     |                     |                     |                     |                     |                     |         |         |
| 19.7.06 | 1     | 1,0040188            | 0,0000008           | 20             | 7,5792                | TF0002          | 54           | 39           | 12            | 27            | 1  | 78,1            |                     |                     |                     |                     |                     |                     |                     |         |         |
| 20.7.06 | 40    | 1,0105687            | 0,0000008           | 20             | 16,2598               | TF0113          | 54           | 55,5         | 13            | 30            | 1  | 53,4            |                     |                     | 11,7                | 0,55                | 0,12                | 0,3                 | 1,29                |         |         |
| 20.7.06 | 40    | 1,0105680            | 0,0000010           | 20             | 16,2595               | TF0113          | 54           | 55,5         | 13            | 30            | 1  | 52,8            |                     |                     | 11,7                | 0,55                | 0,12                | 0,3                 | 1,29                |         |         |
| 20.7.06 | 40    | 1,0105430            | 0,0000012           | 20             | 16,2244               | TF0113          | 54           | 55,5         | 13            | 30            | 1  | 54,9            |                     |                     | 11,7                | 0,55                | 0,12                | 0,3                 | 1,29                |         |         |
| 20.7.06 | 1     | 1,0039520            | 0,0000010           | 20             | 7,4914                | TF0113          | 54           | 55,5         | 13            | 30            | 1  | 77,6            | 1,24                | 27,01               | 8,1                 | 0,02                | 0                   | 0                   | 0,32                |         |         |
| 20.7.06 | 1     | 1,0039578            | 0,0000012           | 20             | 7,4925                | TF0113          | 54           | 55,5         | 13            | 30            | 1  | 84,1            | 1,24                | 27,01               | 8,1                 | 0,02                | 0                   | 0                   | 0,32                |         |         |
| 20.7.06 | 1     | 1,0039553            | 0,0000004           | 20             | 7,4927                | TF0113          | 54           | 55,5         | 13            | 30            | 1  | 80,7            | 1,24                | 27,01               | 8,1                 | 0,02                | 0                   | 0                   | 0,32                |         |         |
| 20.7.06 | 40    | 1,0105653            | 0,0000010           | 20             | 16,2588               | TF0113          | 54           | 55,5         | 13            | 30            | 1  | 50,0            |                     |                     | 11,7                | 0,55                | 0,12                | 0,3                 | 1,29                |         |         |
| 20.7.06 | 40    | 1,0105665            | 0,0000018           | 20             | 16,2593               | TF0113          | 54           | 55,5         | 13            | 30            | 1  | 51,0            |                     |                     | 11,7                | 0,55                | 0,12                | 0,3                 | 1,29                |         |         |
| 20.7.06 | 40    | 1,0105417            | 0,0000010           | 20             | 16,2248               | TF0113          | 54           | 55,5         | 13            | 30            | 1  | 52,7            |                     |                     | 11,7                | 0,55                | 0,12                | 0,3                 | 1,29                |         |         |
| 20.7.06 | 1     | 1,0039545            | 0,0000021           | 20             | 7,4927                | TF0113          | 54           | 55,5         | 13            | 30            | 1  | 79,6            | 1,24                | 27,01               | 8,1                 | 0,02                | 0                   | 0                   | 0,32                |         |         |
| 20.7.06 | 1     | 1,0039572            | 0,0000010           | 20             | 7,4932                | TF0113          | 54           | 55,5         | 13            | 30            | 1  | 82,6            | 1,24                | 27,01               | 8,1                 | 0,02                | 0                   | 0                   | 0,32                |         |         |
| 20.7.06 | 1     | 1,0039468            | 0,0000012           | 20             | 7,4925                | TF0113          | 54           | 55,5         | 13            | 30            | 1  | 69,6            | 1,24                | 27,01               | 8,1                 | 0,02                | 0                   | 0                   | 0,32                |         |         |
| 21.7.06 | 50    | 1,0047007            | 0,0000014           | 20             | 8,4918                | TF0213          | 55           | 15           | 15            | 59            | 1  | 66,4            |                     |                     | 14,1                | 0,74                | 0,06                | 0                   | 0,81                |         |         |
| 21.7.06 | 50    | 1,0046962            | 0,0000010           | 20             | 8,4876                | TF0213          | 55           | 15           | 15            | 59            | 1  | 64,6            |                     |                     | 14,1                | 0,74                | 0,06                | 0                   | 0,81                |         |         |
| 21.7.06 | 50    | 1,0047685            | 0,0000030           | 20             | 8,5819                | TF0213          | 55           | 15           | 15            | 59            | 1  | 65,9            |                     |                     | 14,1                | 0,74                | 0,06                | 0                   | 0,81                |         |         |
| 21.7.06 | 1     | 1,0038082            | 0,0000006           | 20             | 7,3119                | TF0213          | 55           | 15           | 15            | 59            | 1  | 67,1            | 0,46                | 23,97               | 6,9                 | 0                   | 0,01                | 0,07                | 0,17                |         |         |
| 21.7.06 | 1     | 1,0038073            | 0,0000005           | 20             | 7,3112                | TF0213          | 55           | 15           | 15            | 59            | 1  | 66,6            | 0,46                | 23,97               | 6,9                 | 0                   | 0,01                | 0,07                | 0,17                |         |         |
| 21.7.06 | 1     | 1,0038090            | 0,0000008           | 20             | 7,3114                | TF0213          | 55           | 15           | 15            | 59            | 1  | 68,7            | 0,46                | 23,97               | 6,9                 | 0                   | 0,01                | 0,07                | 0,17                |         |         |
| 21.7.06 | 1     | 1,0037983            | 0,0000009           | 20             | 7,2951                | TF0256          | 55           | 19,6         | 18            | 14,1          | 1  | 70,8            |                     |                     | 6,3                 | 0,03                | 0,02                | 0,08                |                     |         |         |
| 21.7.06 | 1     | 1,0037967            | 0,0000005           | 20             | 7,2958                | TF0256          | 55           | 19,6         | 18            | 14,1          | 1  | 68,0            |                     |                     | 6,3                 | 0,03                | 0,02                | 0,08                |                     |         |         |
| 21.7.06 | 1     | 1,0037955            | 0,0000008           | 20             | 7,2958                | TF0256          | 55           | 19,6         | 18            | 14,1          | 1  | 66,4            |                     |                     | 6,3                 | 0,03                | 0,02                | 0,08                |                     |         |         |
| 21.7.06 | 50    | 1,0039600            | 0,0000010           | 20             | 7,5121                | TF0256          | 55           | 19,6         | 18            | 14,1          | 1  | 67,4            |                     |                     | 10                  | 0,49                | 0,01                | 0,04                |                     |         |         |
| 21.7.06 | 50    | 1,0039610            | 0,0000013           | 20             | 7,5121                | TF0256          | 55           | 19,6         | 18            | 14,1          | 1  | 68,7            |                     |                     | 10                  | 0,49                | 0,01                | 0,04                |                     |         |         |
| 21.7.06 | 50    | 1,0039617            | 0,0000005           | 20             | 7,5159                | TF0256          | 55           | 19,6         | 18            | 14,1          | 1  | 65,8            |                     |                     | 10                  | 0,49                | 0,01                | 0,04                |                     |         |         |
| 21.7.06 | 1     | 1,0037962            | 0,0000012           | 20             | 7,2961                | TF0256          | 55           | 19,6         | 18            | 14,1          | 1  | 67,0            |                     |                     | 6,3                 | 0,03                | 0,02                | 0,08                |                     |         |         |
| 21.7.06 | 1     | 1,0037947            | 0,0000006           | 20             | 7,2955                | TF0256          | 55           | 19,6         | 18            | 14,1          | 1  | 65,7            |                     |                     | 6,3                 | 0,03                | 0,02                | 0,08                |                     |         |         |
| 21.7.06 | 1     | 1,0037952            | 0,0000010           | 20             | 7,2935                | TF0256          | 55           | 19,6         | 18            | 14,1          | 1  | 68,3            |                     |                     | 6,3                 | 0,03                | 0,02                | 0,08                |                     |         |         |

|          |     |           |           |    |         |        |    |      |    |      |   |      |      |       |      |      |      |      |      |
|----------|-----|-----------|-----------|----|---------|--------|----|------|----|------|---|------|------|-------|------|------|------|------|------|
| 21.7.06  | 50  | 1,0039608 | 0,0000009 | 20 | 7,5141  | TF0256 | 55 | 19,6 | 18 | 14,1 | 1 | 66,5 |      |       | 10   | 0,49 | 0,01 | 0,04 |      |
| 21.7.06  | 50  | 1,0039613 | 0,0000010 | 20 | 7,5141  | TF0256 | 55 | 19,6 | 18 | 14,1 | 1 | 67,2 |      |       | 10   | 0,49 | 0,01 | 0,04 |      |
| 21.7.06  | 50  | 1,0039635 | 0,0000008 | 20 | 7,5166  | TF0256 | 55 | 19,6 | 18 | 14,1 | 1 | 67,6 |      |       | 10   | 0,49 | 0,01 | 0,04 |      |
| 23.7.06  | 50  | 1,0039658 | 0,0000004 | 20 | 7,5202  | TF0271 | 57 | 19,2 | 20 | 3    | 1 | 67,1 |      |       | 12,8 | 1,08 | 0,04 | 0,3  | 0,46 |
| 23.7.06  | 50  | 1,0039645 | 0,0000018 | 20 | 7,5190  | TF0271 | 57 | 19,2 | 20 | 3    | 1 | 66,4 |      |       | 12,8 | 1,08 | 0,04 | 0,3  | 0,46 |
| 23.7.06  | 50  | 1,0039655 | 0,0000012 | 20 | 7,5197  | TF0271 | 57 | 19,2 | 20 | 3    | 1 | 67,1 |      |       | 12,8 | 1,08 | 0,04 | 0,3  | 0,46 |
| 23.7.06  | 1   | 1,0033762 | 0,0000008 | 20 | 6,7406  | TF0271 | 57 | 19,2 | 20 | 3    | 1 | 67,7 | 0,45 | 23,08 | 8,2  | 0    | 0,02 | 0,01 |      |
| 23.7.06  | 1   | 1,0033758 | 0,0000012 | 20 | 6,7398  | TF0271 | 57 | 19,2 | 20 | 3    | 1 | 68,1 | 0,45 | 23,08 | 8,2  | 0    | 0,02 | 0,01 |      |
| 23.7.06  | 1   | 1,0033758 | 0,0000015 | 20 | 6,7399  | TF0271 | 57 | 19,2 | 20 | 3    | 1 | 67,9 | 0,45 | 23,08 | 8,2  | 0    | 0,02 | 0,01 |      |
| 24.7.06  | 2   | 1,0033987 | 0,0000010 | 20 | 6,7695  | TF0284 | 58 | 35   | 18 | 14   | 1 | 68,6 | 0,36 | 22,22 | 8,2  | 0,01 | 0    | 0,02 | 0,19 |
| 24.7.06  | 2   | 1,0033955 | 0,0000000 | 20 | 6,7683  | TF0284 | 58 | 35   | 18 | 14   | 1 | 65,5 | 0,36 | 22,22 | 8,2  | 0,01 | 0    | 0,02 | 0,19 |
| 24.7.06  | 2   | 1,0033965 | 0,0000012 | 20 | 6,7685  | TF0284 | 58 | 35   | 18 | 14   | 1 | 66,7 | 0,36 | 22,22 | 8,2  | 0,01 | 0    | 0,02 | 0,19 |
| 24.7.06  | 10  | 1,0034040 | 0,0000009 | 20 | 6,7776  | TF0284 | 58 | 35   | 18 | 14   | 1 | 67,5 | 0,44 | 24,76 | 7,9  | 0,05 | 0,01 | 0,05 | 0,18 |
| 24.7.06  | 10  | 1,0034052 | 0,0000005 | 20 | 6,7781  | TF0284 | 58 | 35   | 18 | 14   | 1 | 68,5 | 0,44 | 24,76 | 7,9  | 0,05 | 0,01 | 0,05 | 0,18 |
| 24.7.06  | 10  | 1,0034050 | 0,0000010 | 20 | 6,7774  | TF0284 | 58 | 35   | 18 | 14   | 1 | 69,0 | 0,44 | 24,76 | 7,9  | 0,05 | 0,01 | 0,05 | 0,18 |
| 24.7.06  | 20  | 1,0032885 | 0,0000012 | 20 | 6,6149  | TF0284 | 58 | 35   | 18 | 14   | 1 | 77,7 | 0,32 | 20,33 | 10,1 | 0,06 | 0,01 | 0,02 | 0,25 |
| 24.7.06  | 20  | 1,0032853 | 0,0000010 | 20 | 6,6159  | TF0284 | 58 | 35   | 18 | 14   | 1 | 72,5 | 0,32 | 20,33 | 10,1 | 0,06 | 0,01 | 0,02 | 0,25 |
| 24.7.06  | 20  | 1,0032943 | 0,0000013 | 20 | 6,6189  | TF0284 | 58 | 35   | 18 | 14   | 1 | 81,3 | 0,32 | 20,33 | 10,1 | 0,06 | 0,01 | 0,02 | 0,25 |
| 24.7.06  | 50  | 1,0037163 | 0,0000010 | 20 | 7,1677  | TF0284 | 58 | 35   | 18 | 14   | 1 | 90,0 |      |       | 14,9 | 0,73 | 0,12 | 1,19 | 0,96 |
| 24.7.06  | 50  | 1,0037140 | 0,0000023 | 20 | 7,1680  | TF0284 | 58 | 35   | 18 | 14   | 1 | 86,5 |      |       | 14,9 | 0,73 | 0,12 | 1,19 | 0,96 |
| 24.7.06  | 50  | 1,0037057 | 0,0000008 | 20 | 7,1688  | TF0284 | 58 | 35   | 18 | 14   | 1 | 74,7 |      |       | 14,9 | 0,73 | 0,12 | 1,19 | 0,96 |
| 24.7.06  | 100 | 1,0063652 | 0,0000015 | 20 | 10,6611 | TF0284 | 58 | 35   | 18 | 14   | 1 | 97,0 | 3,71 | 18,91 | 53,2 | 3,4  | 0    | 0    | 3,71 |
| 24.7.06  | 100 | 1,0063568 | 0,0000010 | 20 | 10,6592 | TF0284 | 58 | 35   | 18 | 14   | 1 | 87,9 | 3,71 | 18,91 | 53,2 | 3,4  | 0    | 0    | 3,71 |
| 24.7.06  | 100 | 1,0063615 | 0,0000005 | 20 | 10,6626 | TF0284 | 58 | 35   | 18 | 14   | 1 | 90,6 | 3,71 | 18,91 | 53,2 | 3,4  | 0    | 0    | 3,71 |
| 24.7.06  | 300 | 1,0066488 | 0,0000067 | 20 | 11,0388 | TF0284 | 58 | 35   | 18 | 14   | 1 | 94,2 | 3,76 | 18,7  | 54,7 | 3,55 | 0    | 0    | 5,48 |
| 24.7.06  | 300 | 1,0066480 | 0,0000039 | 20 | 11,0381 | TF0284 | 58 | 35   | 18 | 14   | 1 | 93,8 | 3,76 | 18,7  | 54,7 | 3,55 | 0    | 0    | 5,48 |
| 24.7.06  | 300 | 1,0066343 | 0,0000012 | 20 | 11,0333 | TF0284 | 58 | 35   | 18 | 14   | 1 | 80,5 | 3,76 | 18,7  | 54,7 | 3,55 | 0    | 0    | 5,48 |
| 24.7.06  | 400 | 1,0066672 | 0,0000010 | 20 | 11,0644 | TF0284 | 58 | 35   | 18 | 14   | 1 | 92,9 |      |       | 54,7 | 3,45 | 0    | 0    | 5,24 |
| 24.7.06  | 400 | 1,0066567 | 0,0000010 | 20 | 11,0557 | TF0284 | 58 | 35   | 18 | 14   | 1 | 87,7 |      |       | 54,7 | 3,45 | 0    | 0    | 5,24 |
| 24.7.06  | 2   | 1,0033947 | 0,0000010 | 20 | 6,7693  | TF0284 | 58 | 35   | 18 | 14   | 1 | 63,5 | 0,36 | 22,22 | 8,2  | 0,01 | 0    | 0,02 | 0,19 |
| 24.7.06  | 2   | 1,0033932 | 0,0000012 | 20 | 6,7690  | TF0284 | 58 | 35   | 18 | 14   | 1 | 61,8 | 0,36 | 22,22 | 8,2  | 0,01 | 0    | 0,02 | 0,19 |
| 24.7.06  | 2   | 1,0033952 | 0,0000008 | 20 | 6,7890  | TF0284 | 58 | 35   | 18 | 14   | 1 | 44,4 | 0,36 | 22,22 | 8,2  | 0,01 | 0    | 0,02 | 0,19 |
| 24.7.06  | 10  | 1,0034043 | 0,0000012 | 20 | 6,7841  | TF0284 | 58 | 35   | 18 | 14   | 1 | 61,4 | 0,44 | 24,76 | 7,9  | 0,05 | 0,01 | 0,05 | 0,18 |
| 24.7.06  | 10  | 1,0034025 | 0,0000015 | 20 | 6,7848  | TF0284 | 58 | 35   | 18 | 14   | 1 | 58,3 | 0,44 | 24,76 | 7,9  | 0,05 | 0,01 | 0,05 | 0,18 |
| 24.7.06  | 10  | 1,0034040 | 0,0000010 | 20 | 6,7838  | TF0284 | 58 | 35   | 18 | 14   | 1 | 61,3 | 0,44 | 24,76 | 7,9  | 0,05 | 0,01 | 0,05 | 0,18 |
| 24.7.06  | 20  | 1,0032900 | 0,0000010 | 20 | 6,6199  | TF0284 | 58 | 35   | 18 | 14   | 1 | 74,6 | 0,32 | 20,33 | 10,1 | 0,06 | 0,01 | 0,02 | 0,25 |
| 24.07.06 | 20  | 1,0032818 | 0,0000010 | 20 | 6,6181  | TF0284 | 58 | 35   | 18 | 14   | 1 | 65,6 | 0,32 | 20,33 | 10,1 | 0,06 | 0,01 | 0,02 | 0,25 |
| 24.7.06  | 20  | 1,0032842 | 0,0000012 | 20 | 6,6180  | TF0284 | 58 | 35   | 18 | 14   | 1 | 68,8 | 0,32 | 20,33 | 10,1 | 0,06 | 0,01 | 0,02 | 0,25 |
| 24.7.06  | 50  | 1,0037123 | 0,0000004 | 20 | 7,1692  | TF0284 | 58 | 35   | 18 | 14   | 1 | 83,2 |      |       | 14,9 | 0,73 | 0,12 | 1,19 | 0,96 |

|         |     |           |           |    |         |        |    |    |    |       |   |      |      |       |      |      |      |          |          |
|---------|-----|-----------|-----------|----|---------|--------|----|----|----|-------|---|------|------|-------|------|------|------|----------|----------|
| 24.7.06 | 50  | 1,0037157 | 0,0000010 | 20 | 7,1683  | TF0284 | 58 | 35 | 18 | 14    | 1 | 88,4 |      |       | 14,9 | 0,73 | 0,12 | 1,19     | 0,96     |
| 24.7.06 | 50  | 1,0037088 | 0,0000008 | 20 | 7,1664  | TF0284 | 58 | 35 | 18 | 14    | 1 | 81,4 |      |       | 14,9 | 0,73 | 0,12 | 1,19     | 0,96     |
| 24.7.06 | 100 | 1,0063723 | 0,0000004 | 20 | 10,6778 | TF0284 | 58 | 35 | 18 | 14    | 1 | 89,8 | 3,71 | 18,91 | 53,2 | 3,4  | 0    | 0        | 3,71     |
| 24.7.06 | 100 | 1,0063723 | 0,0000008 | 20 | 10,6793 | TF0284 | 58 | 35 | 18 | 14    | 1 | 88,3 | 3,71 | 18,91 | 53,2 | 3,4  | 0    | 0        | 3,71     |
| 24.7.06 | 300 | 1,0066518 | 0,0000015 | 20 | 11,0420 | TF0284 | 58 | 35 | 18 | 14    | 1 | 95,0 | 3,76 | 18,7  | 54,7 | 3,55 | 0    | 0        | 5,48     |
| 24.7.06 | 300 | 1,0066463 | 0,0000011 | 20 | 11,0406 | TF0284 | 58 | 35 | 18 | 14    | 1 | 89,1 | 3,76 | 18,7  | 54,7 | 3,55 | 0    | 0        | 5,48     |
| 24.7.06 | 300 | 1,0066432 | 0,0000008 | 20 | 11,0389 | TF0284 | 58 | 35 | 18 | 14    | 1 | 86,6 | 3,76 | 18,7  | 54,7 | 3,55 | 0    | 0        | 5,48     |
| 24.7.06 | 400 | 1,0066582 | 0,0000004 | 20 | 11,0594 | TF0284 | 58 | 35 | 18 | 14    | 1 | 85,9 |      |       | 54,7 | 3,45 | 0    | 0        | 5,24     |
| 24.7.06 | 400 | 1,0066502 | 0,0000008 | 20 | 11,0538 | TF0284 | 58 | 35 | 18 | 14    | 1 | 81,0 |      |       | 54,7 | 3,45 | 0    | 0        | 5,24     |
| 22.8.06 | 5   | 1,0041963 | 0,0000013 | 20 | 7,8029  | 075_a  | 54 | 48 | 12 | 11,7  | 1 | 88,9 |      |       |      |      |      |          |          |
| 22.8.06 | 5   | 1,0041903 | 0,0000005 | 20 | 7,8029  | 075_a  | 54 | 48 | 12 | 11,7  | 1 | 81,0 |      |       |      |      |      |          |          |
| 22.8.06 | 5   | 1,0042015 | 0,0000012 | 20 | 7,8072  | 075_a  | 54 | 48 | 12 | 11,7  | 1 | 91,4 |      |       |      |      |      |          |          |
| 22.8.06 | 5   | 1,0041923 | 0,0000013 | 20 | 7,8049  | 075_a  | 54 | 48 | 12 | 11,7  | 1 | 81,6 |      |       |      |      |      |          |          |
| 22.8.06 | 5   | 1,0041883 | 0,0000005 | 20 | 7,8029  | 075_a  | 54 | 48 | 12 | 11,7  | 1 | 78,3 |      |       |      |      |      |          |          |
| 22.8.06 | 5   | 1,0041903 | 0,0000008 | 20 | 7,8046  | 075_a  | 54 | 48 | 12 | 11,7  | 1 | 79,3 |      |       |      |      |      |          |          |
| 22.8.06 | 5   | 1,0041938 | 0,0000004 | 20 | 7,8044  | 075_a  | 54 | 48 | 12 | 11,7  | 1 | 84,1 |      |       |      |      |      |          |          |
| 22.8.06 | 5   | 1,0041940 | 0,0000013 | 20 | 7,8072  | 075_a  | 54 | 48 | 12 | 11,7  | 1 | 81,5 |      |       |      |      |      |          |          |
| 22.8.06 | 5   | 1,0041875 | 0,0000010 | 20 | 7,8046  | 075_a  | 54 | 48 | 12 | 11,7  | 1 | 75,5 |      |       |      |      |      |          |          |
| 23.8.06 | 38  | 1,0079425 | 0,0000008 | 20 | 12,7816 | ABBoje | 54 | 53 | 13 | 50,73 | 1 | 61,3 |      |       |      |      |      |          |          |
| 23.8.06 | 38  | 1,0079792 | 0,0000010 | 20 | 12,8347 | ABBoje | 54 | 53 | 13 | 50,73 | 1 | 56,7 |      |       |      |      |      |          |          |
| 23.8.06 | 38  | 1,0079535 | 0,0000008 | 20 | 12,7963 | ABBoje | 54 | 53 | 13 | 50,73 | 1 | 61,1 |      |       |      |      |      |          |          |
| 23.8.06 | 38  | 1,0079058 | 0,0000011 | 20 | 12,7358 | ABBoje | 54 | 53 | 13 | 50,73 | 1 | 58,6 |      |       |      |      |      |          |          |
| 23.8.06 | 1   | 1,0040418 | 0,0000008 | 20 | 7,6106  | ABBoje | 54 | 53 | 13 | 50,73 | 1 | 77,1 |      |       |      |      |      |          |          |
| 23.8.06 | 1   | 1,0040405 | 0,0000010 | 20 | 7,6078  | ABBoje | 54 | 53 | 13 | 50,73 | 1 | 78,1 |      |       |      |      |      |          |          |
| 23.8.06 | 1   | 1,0040395 | 0,0000004 | 20 | 7,6081  | ABBoje | 54 | 53 | 13 | 50,73 | 1 | 76,5 |      |       |      |      |      |          |          |
| 23.8.06 | 1   | 1,0040395 | 0,0000008 | 20 | 7,6083  | ABBoje | 54 | 53 | 13 | 50,73 | 1 | 76,3 |      |       |      |      |      |          |          |
| 23.8.06 | 38  | 1,0079402 | 0,0000005 | 20 | 12,7786 | ABBoje | 54 | 53 | 13 | 50,73 | 1 | 61,2 |      |       |      |      |      |          |          |
| 23.8.06 | 38  | 1,0079778 | 0,0000008 | 20 | 12,8283 | ABBoje | 54 | 53 | 13 | 50,73 | 1 | 61,4 |      |       |      |      |      |          |          |
| 23.8.06 | 38  | 1,0079518 | 0,0000010 | 20 | 12,7951 | ABBoje | 54 | 53 | 13 | 50,73 | 1 | 60,1 |      |       |      |      |      |          |          |
| 23.8.06 | 38  | 1,0079072 | 0,0000010 | 20 | 12,7379 | ABBoje | 54 | 53 | 13 | 50,73 | 1 | 58,3 |      |       |      |      |      |          |          |
| 23.8.06 | 1   | 1,0040390 | 0,0000010 | 20 | 7,6081  | ABBoje | 54 | 53 | 13 | 50,73 | 1 | 75,8 |      |       |      |      |      |          |          |
| 23.8.06 | 1   | 1,0040378 | 0,0000008 | 20 | 7,6087  | ABBoje | 54 | 53 | 13 | 50,73 | 1 | 73,6 |      |       |      |      |      |          |          |
| 23.8.06 | 1   | 1,0040393 | 0,0000008 | 20 | 7,6081  | ABBoje | 54 | 53 | 13 | 50,73 | 1 | 76,3 |      |       |      |      |      |          |          |
| 23.8.06 | 1   | 1,0040377 | 0,0000012 | 20 | 7,6083  | ABBoje | 54 | 53 | 13 | 50,73 | 1 | 73,9 |      |       |      |      |      |          |          |
| 7.11.06 | 1   | 1,0108810 | 0,0000025 | 20 | 16,6656 | TF0002 | 54 | 39 | 12 | 27    | 1 | 60,2 |      |       |      |      |      | 1829,030 | 1916,819 |
| 7.11.06 | 1   | 1,0108773 | 0,0000008 | 20 | 16,6656 | TF0002 | 54 | 39 | 12 | 27    | 1 | 55,3 |      |       |      |      |      | 1829,030 | 1916,819 |
| 7.11.06 | 1   | 1,0108773 | 0,0000024 | 20 | 16,6660 | TF0002 | 54 | 39 | 12 | 27    | 1 | 55,0 |      |       |      |      |      | 1829,030 | 1916,819 |
| 7.11.06 | 1   | 1,0108768 | 0,0000012 | 20 | 16,6660 | TF0002 | 54 | 39 | 12 | 27    | 1 | 54,3 |      |       |      |      |      | 1829,030 | 1916,819 |
| 7.11.06 | 1   | 1,0108772 | 0,0000020 | 20 | 16,6661 | TF0002 | 54 | 39 | 12 | 27    | 1 | 54,6 |      |       |      |      |      | 1829,030 | 1916,819 |
| 7.11.06 | 1   | 1,0108752 | 0,0000047 | 20 | 16,6661 | TF0002 | 54 | 39 | 12 | 27    | 1 | 51,9 |      |       |      |      |      | 1829,030 | 1916,819 |

|          |    |           |           |    |         |        |    |      |    |      |   |      |      |       |      |      |      |      |      |          |          |
|----------|----|-----------|-----------|----|---------|--------|----|------|----|------|---|------|------|-------|------|------|------|------|------|----------|----------|
| 8.11.06  | 1  | 1,0047480 | 0,0000019 | 20 | 8,5508  | TF0113 | 54 | 55,5 | 13 | 30   | 1 | 70,0 | 0,7  | 18,52 | 9,9  | 0,22 | 0,28 | 0,77 | 0,14 | 1638,353 | 1698,905 |
| 8.11.06  | 1  | 1,0047457 | 0,0000019 | 20 | 8,5508  | TF0113 | 54 | 55,5 | 13 | 30   | 1 | 66,9 | 0,7  | 18,52 | 9,9  | 0,22 | 0,28 | 0,77 | 0,14 | 1638,353 | 1698,905 |
| 8.11.06  | 1  | 1,0047482 | 0,0000038 | 20 | 8,5509  | TF0113 | 54 | 55,5 | 13 | 30   | 1 | 70,0 | 0,7  | 18,52 | 9,9  | 0,22 | 0,28 | 0,77 | 0,14 | 1638,353 | 1698,905 |
| 8.11.06  | 1  | 1,0047435 | 0,0000037 | 20 | 8,5509  | TF0113 | 54 | 55,5 | 13 | 30   | 1 | 63,9 | 0,7  | 18,52 | 9,9  | 0,22 | 0,28 | 0,77 | 0,14 | 1638,353 | 1698,905 |
| 8.11.06  | 1  | 1,0047615 | 0,0000061 | 20 | 8,5516  | TF0113 | 54 | 55,5 | 13 | 30   | 1 | 87,0 | 0,7  | 18,52 | 9,9  | 0,22 | 0,28 | 0,77 | 0,14 | 1638,353 | 1698,905 |
| 8.11.06  | 1  | 1,0047538 | 0,0000030 | 20 | 8,5516  | TF0113 | 54 | 55,5 | 13 | 30   | 1 | 76,9 | 0,7  | 18,52 | 9,9  | 0,22 | 0,28 | 0,77 | 0,14 | 1638,353 | 1698,905 |
| 8.11.06  | 40 | 1,0116885 | 0,0000081 | 20 | 17,7044 | TF0113 | 54 | 55,5 | 13 | 30   | 1 | 87,9 |      |       | 17,1 | 0,69 | 0,22 | 3,64 | 1,64 | 1863,307 | 1933,991 |
| 8.11.06  | 40 | 1,0116598 | 0,0000015 | 20 | 17,7044 | TF0113 | 54 | 55,5 | 13 | 30   | 1 | 50,0 |      |       | 17,1 | 0,69 | 0,22 | 3,64 | 1,64 | 1863,307 | 1933,991 |
| 8.11.06  | 40 | 1,0116653 | 0,0000024 | 20 | 17,7065 | TF0113 | 54 | 55,5 | 13 | 30   | 1 | 55,1 |      |       | 17,1 | 0,69 | 0,22 | 3,64 | 1,64 | 1863,307 | 1933,991 |
| 8.11.06  | 40 | 1,0116622 | 0,0000027 | 20 | 17,7065 | TF0113 | 54 | 55,5 | 13 | 30   | 1 | 50,9 |      |       | 17,1 | 0,69 | 0,22 | 3,64 | 1,64 | 1863,307 | 1933,991 |
| 8.11.06  | 40 | 1,0116635 | 0,0000021 | 20 | 17,7069 | TF0113 | 54 | 55,5 | 13 | 30   | 1 | 52,3 |      |       | 17,1 | 0,69 | 0,22 | 3,64 | 1,64 | 1863,307 | 1933,991 |
| 8.11.06  | 40 | 1,0116600 | 0,0000025 | 20 | 17,7069 | TF0113 | 54 | 55,5 | 13 | 30   | 1 | 47,7 |      |       | 17,1 | 0,69 | 0,22 | 3,64 | 1,64 | 1863,307 | 1933,991 |
| 11.11.06 | 3  | 1,0039542 | 0,0000013 | 20 | 7,5008  | TF0213 | 55 | 15   | 15 | 59   | 1 | 71,0 | 0,51 | 15,48 | 4    | 0,23 | 0,06 | 0,09 | 0,15 | 1622,687 | 1689,682 |
| 11.11.06 | 3  | 1,0039534 | 0,0000013 | 20 | 7,5008  | TF0213 | 55 | 15   | 15 | 59   | 1 | 70,1 | 0,51 | 15,48 | 4    | 0,23 | 0,06 | 0,09 | 0,15 | 1622,687 | 1689,682 |
| 11.11.06 | 3  | 1,0039543 | 0,0000016 | 20 | 7,5006  | TF0213 | 55 | 15   | 15 | 59   | 1 | 71,4 | 0,51 | 15,48 | 4    | 0,23 | 0,06 | 0,09 | 0,15 | 1622,687 | 1689,682 |
| 11.11.06 | 3  | 1,0039637 | 0,0000020 | 20 | 7,5006  | TF0213 | 55 | 15   | 15 | 59   | 1 | 83,8 | 0,51 | 15,48 | 4    | 0,23 | 0,06 | 0,09 | 0,15 | 1622,687 | 1689,682 |
| 11.11.06 | 3  | 1,0039543 | 0,0000010 | 20 | 7,5009  | TF0213 | 55 | 15   | 15 | 59   | 1 | 71,1 | 0,51 | 15,48 | 4    | 0,23 | 0,06 | 0,09 | 0,15 | 1622,687 | 1689,682 |
| 11.11.06 | 3  | 1,0039640 | 0,0000010 | 20 | 7,5001  | TF0213 | 55 | 15   | 15 | 59   | 1 | 84,7 | 0,51 | 15,48 | 4    | 0,23 | 0,06 | 0,09 | 0,15 | 1622,687 | 1689,682 |
| 11.11.06 | 50 | 1,0089180 | 0,0000023 | 20 | 14,0677 | TF0213 | 55 | 15   | 15 | 59   | 1 | 64,4 |      |       | 24,2 | 1,16 | 0,06 | 6,53 | 0,21 | 1886,928 | 1863,216 |
| 11.11.06 | 50 | 1,0089215 | 0,0000057 | 20 | 14,0677 | TF0213 | 55 | 15   | 15 | 59   | 1 | 69,1 |      |       | 24,2 | 1,16 | 0,06 | 6,53 | 0,21 | 1886,928 | 1863,216 |
| 11.11.06 | 50 | 1,0088995 | 0,0000027 | 20 | 14,0457 | TF0213 | 55 | 15   | 15 | 59   | 1 | 62,1 |      |       | 24,2 | 1,16 | 0,06 | 6,53 | 0,21 | 1886,928 | 1863,216 |
| 11.11.06 | 50 | 1,0089013 | 0,0000029 | 20 | 14,0457 | TF0213 | 55 | 15   | 15 | 59   | 1 | 64,5 |      |       | 24,2 | 1,16 | 0,06 | 6,53 | 0,21 | 1886,928 | 1863,216 |
| 11.11.06 | 50 | 1,0088753 | 0,0000020 | 20 | 14,0033 | TF0213 | 55 | 15   | 15 | 59   | 1 | 72,5 |      |       | 24,2 | 1,16 | 0,06 | 6,53 | 0,21 | 1886,928 | 1863,216 |
| 11.11.06 | 50 | 1,0088713 | 0,0000021 | 20 | 14,0033 | TF0213 | 55 | 15   | 15 | 59   | 1 | 67,2 |      |       | 24,2 | 1,16 | 0,06 | 6,53 | 0,21 | 1886,928 | 1863,216 |
| 12.11.06 | 3  | 1,0037755 | 0,0000020 | 20 | 7,2512  | TF0256 | 55 | 19,6 | 18 | 14,1 | 1 | 84,6 |      |       | 3    | 0,15 | 0,1  | 0,1  |      | 1617,465 | 1661,216 |
| 12.11.06 | 3  | 1,0037753 | 0,0000012 | 20 | 7,2637  | TF0256 | 55 | 19,6 | 18 | 14,1 | 1 | 71,9 |      |       | 3    | 0,15 | 0,1  | 0,1  |      | 1617,465 | 1661,216 |
| 12.11.06 | 3  | 1,0037813 | 0,0000017 | 20 | 7,2638  | TF0256 | 55 | 19,6 | 18 | 14,1 | 1 | 79,7 |      |       | 3    | 0,15 | 0,1  | 0,1  |      | 1617,465 | 1661,216 |
| 12.11.06 | 3  | 1,0037733 | 0,0000026 | 20 | 7,2638  | TF0256 | 55 | 19,6 | 18 | 14,1 | 1 | 69,1 |      |       | 3    | 0,15 | 0,1  | 0,1  |      | 1617,465 | 1661,216 |
| 12.11.06 | 3  | 1,0037775 | 0,0000027 | 20 | 7,2653  | TF0256 | 55 | 19,6 | 18 | 14,1 | 1 | 73,2 |      |       | 3    | 0,15 | 0,1  | 0,1  |      | 1617,465 | 1661,216 |
| 12.11.06 | 3  | 1,0037727 | 0,0000015 | 20 | 7,2653  | TF0256 | 55 | 19,6 | 18 | 14,1 | 1 | 66,8 |      |       | 3    | 0,15 | 0,1  | 0,1  |      | 1617,465 | 1661,216 |
| 12.11.06 | 51 | 1,0039018 | 0,0000016 | 20 | 7,4285  | TF0256 | 55 | 19,6 | 18 | 14,1 | 1 | 74,2 |      |       | 9    | 0,54 | 0,43 | 0,32 |      | 1664,588 | 1671,313 |
| 12.11.06 | 51 | 1,0038955 | 0,0000012 | 20 | 7,4285  | TF0256 | 55 | 19,6 | 18 | 14,1 | 1 | 65,8 |      |       | 9    | 0,54 | 0,43 | 0,32 |      | 1664,588 | 1671,313 |
| 12.11.06 | 51 | 1,0039000 | 0,0000024 | 20 | 7,4292  | TF0256 | 55 | 19,6 | 18 | 14,1 | 1 | 71,1 |      |       | 9    | 0,54 | 0,43 | 0,32 |      | 1664,588 | 1671,313 |
| 12.11.06 | 51 | 1,0038907 | 0,0000084 | 20 | 7,4292  | TF0256 | 55 | 19,6 | 18 | 14,1 | 1 | 58,8 |      |       | 9    | 0,54 | 0,43 | 0,32 |      | 1664,588 | 1671,313 |
| 12.11.06 | 51 | 1,0038975 | 0,0000017 | 20 | 7,4280  | TF0256 | 55 | 19,6 | 18 | 14,1 | 1 | 68,9 |      |       | 9    | 0,54 | 0,43 | 0,32 |      | 1664,588 | 1671,313 |
| 12.11.06 | 51 | 1,0039007 | 0,0000035 | 20 | 7,4280  | TF0256 | 55 | 19,6 | 18 | 14,1 | 1 | 73,1 |      |       | 9    | 0,54 | 0,43 | 0,32 |      | 1664,588 | 1671,313 |
| 13.11.06 | 50 | 1,0039530 | 0,0000010 | 20 | 7,5023  | TF0271 | 57 | 19,2 | 20 | 3    | 1 | 68,0 |      |       | 12,2 | 0,75 | 0,22 | 1,02 | 0,49 | 1691,621 | 1695,163 |
| 13.11.06 | 50 | 1,0039428 | 0,0000038 | 20 | 7,5023  | TF0271 | 57 | 19,2 | 20 | 3    | 1 | 54,6 |      |       | 12,2 | 0,75 | 0,22 | 1,02 | 0,49 | 1691,621 | 1695,163 |
| 13.11.06 | 50 | 1,0039548 | 0,0000010 | 20 | 7,5020  | TF0271 | 57 | 19,2 | 20 | 3    | 1 | 70,8 |      |       | 12,2 | 0,75 | 0,22 | 1,02 | 0,49 | 1691,621 | 1695,163 |
| 13.11.06 | 50 | 1,0039545 | 0,0000013 | 20 | 7,5020  | TF0271 | 57 | 19,2 | 20 | 3    | 1 | 70,3 |      |       | 12,2 | 0,75 | 0,22 | 1,02 | 0,49 | 1691,621 | 1695,163 |

|          |    |           |           |    |         |        |    |      |    |       |   |      |      |       |      |      |      |      |      |          |          |
|----------|----|-----------|-----------|----|---------|--------|----|------|----|-------|---|------|------|-------|------|------|------|------|------|----------|----------|
| 13.11.06 | 50 | 1,0039542 | 0,0000015 | 20 | 7,5024  | TF0271 | 57 | 19,2 | 20 | 3     | 1 | 69,4 |      |       | 12,2 | 0,75 | 0,22 | 1,02 | 0,49 | 1691,621 | 1695,163 |
| 13.11.06 | 50 | 1,0039512 | 0,0000008 | 20 | 7,5024  | TF0271 | 57 | 19,2 | 20 | 3     | 1 | 65,4 |      |       | 12,2 | 0,75 | 0,22 | 1,02 | 0,49 | 1691,621 | 1695,163 |
| 13.11.06 | 3  | 1,0033893 | 0,0000012 | 20 | 6,7650  | TF0271 | 57 | 19,2 | 20 | 3     | 1 | 60,7 | 0,43 | 16,12 | 9,4  | 0,23 | 0,28 | 0,19 | 0,87 | 1581,720 | 1639,866 |
| 13.11.06 | 3  | 1,0033863 | 0,0000008 | 20 | 6,7652  | TF0271 | 57 | 19,2 | 20 | 3     | 1 | 56,6 | 0,43 | 16,12 | 9,4  | 0,23 | 0,28 | 0,19 | 0,87 | 1581,720 | 1639,866 |
| 13.11.06 | 3  | 1,0033855 | 0,0000013 | 20 | 6,7543  | TF0271 | 57 | 19,2 | 20 | 3     | 1 | 66,4 | 0,43 | 16,12 | 9,4  | 0,23 | 0,28 | 0,19 | 0,87 | 1581,720 | 1639,866 |
| 13.11.06 | 3  | 1,0033840 | 0,0000018 | 20 | 6,7543  | TF0271 | 57 | 19,2 | 20 | 3     | 1 | 64,4 | 0,43 | 16,12 | 9,4  | 0,23 | 0,28 | 0,19 | 0,87 | 1581,720 | 1639,866 |
| 13.11.06 | 3  | 1,0033877 | 0,0000008 | 20 | 6,7543  | TF0271 | 57 | 19,2 | 20 | 3     | 1 | 69,2 | 0,43 | 16,12 | 9,4  | 0,23 | 0,28 | 0,19 | 0,87 | 1581,720 | 1639,866 |
| 13.11.06 | 3  | 1,0033872 | 0,0000014 | 20 | 6,7539  | TF0271 | 57 | 19,2 | 20 | 3     | 1 | 68,9 | 0,43 | 16,12 | 9,4  | 0,23 | 0,28 | 0,19 | 0,87 | 1581,720 | 1639,866 |
| 15.11.06 | 3  | 1,0033423 | 0,0000008 | 20 | 6,6903  | TF0284 | 58 | 35   | 18 | 14    | 1 | 73,3 | 0,63 |       | 12,9 | 0,43 | 0,44 | 1,5  | 0,13 | 1540,939 | 1562,656 |
| 15.11.06 | 3  | 1,0033343 | 0,0000010 | 20 | 6,6903  | TF0284 | 58 | 35   | 18 | 14    | 1 | 62,7 | 0,63 |       | 12,9 | 0,43 | 0,44 | 1,5  | 0,13 | 1540,939 | 1562,656 |
| 15.11.06 | 3  | 1,0033357 | 0,0000012 | 20 | 6,6900  | TF0284 | 58 | 35   | 18 | 14    | 1 | 64,8 | 0,63 |       | 12,9 | 0,43 | 0,44 | 1,5  | 0,13 | 1540,939 | 1562,656 |
| 15.11.06 | 3  | 1,0033343 | 0,0000018 | 20 | 6,6900  | TF0284 | 58 | 35   | 18 | 14    | 1 | 63,0 | 0,63 |       | 12,9 | 0,43 | 0,44 | 1,5  | 0,13 | 1540,939 | 1562,656 |
| 15.11.06 | 3  | 1,0033385 | 0,0000008 | 20 | 6,6908  | TF0284 | 58 | 35   | 18 | 14    | 1 | 67,7 | 0,63 |       | 12,9 | 0,43 | 0,44 | 1,5  | 0,13 | 1540,939 | 1562,656 |
| 15.11.06 | 3  | 1,0033358 | 0,0000009 | 20 | 6,6908  | TF0284 | 58 | 35   | 18 | 14    | 1 | 64,2 | 0,63 |       | 12,9 | 0,43 | 0,44 | 1,5  | 0,13 | 1540,939 | 1562,656 |
| 15.11.06 | 50 | 1,0037667 | 0,0000016 | 20 | 7,2543  | TF0284 | 58 | 35   | 18 | 14    | 1 | 69,8 |      |       | 16,8 | 0,89 | 0,22 | 2,24 | 0,18 | 1652,956 | 1618,278 |
| 15.11.06 | 50 | 1,0037628 | 0,0000014 | 20 | 7,2543  | TF0284 | 58 | 35   | 18 | 14    | 1 | 64,8 |      |       | 16,8 | 0,89 | 0,22 | 2,24 | 0,18 | 1652,956 | 1618,278 |
| 15.11.06 | 50 | 1,0037618 | 0,0000012 | 20 | 7,2546  | TF0284 | 58 | 35   | 18 | 14    | 1 | 63,1 |      |       | 16,8 | 0,89 | 0,22 | 2,24 | 0,18 | 1652,956 | 1618,278 |
| 15.11.06 | 50 | 1,0037615 | 0,0000011 | 20 | 7,2546  | TF0284 | 58 | 35   | 18 | 14    | 1 | 62,7 |      |       | 16,8 | 0,89 | 0,22 | 2,24 | 0,18 | 1652,956 | 1618,278 |
| 15.11.06 | 50 | 1,0037662 | 0,0000015 | 20 | 7,2546  | TF0284 | 58 | 35   | 18 | 14    | 1 | 68,9 |      |       | 16,8 | 0,89 | 0,22 | 2,24 | 0,18 | 1652,956 | 1618,278 |
| 15.11.06 | 50 | 1,0037650 | 0,0000008 | 20 | 7,2546  | TF0284 | 58 | 35   | 18 | 14    | 1 | 67,3 |      |       | 16,8 | 0,89 | 0,22 | 2,24 | 0,18 | 1652,956 | 1618,278 |
| 27.10.07 | 6  | 1,0096318 | 0,0000013 | 20 | 15,0203 | TF0360 | 54 | 36   | 10 | 26,94 | 1 | 55,1 |      |       | 19   | 0,64 | 0,15 | 0,81 | 0,84 |          |          |
| 27.10.07 | 6  | 1,0096352 | 0,0000010 | 20 | 15,0210 | TF0360 | 54 | 36   | 10 | 26,94 | 1 | 58,8 |      |       | 19   | 0,64 | 0,15 | 0,81 | 0,84 |          |          |
| 27.10.07 | 6  | 1,0096345 | 0,0000008 | 20 | 15,0245 | TF0360 | 54 | 36   | 10 | 26,94 | 1 | 54,4 |      |       | 19   | 0,64 | 0,15 | 0,81 | 0,84 |          |          |
| 27.10.07 | 6  | 1,0096337 | 0,0000011 | 20 | 15,0245 | TF0360 | 54 | 36   | 10 | 26,94 | 1 | 53,3 |      |       | 19   | 0,64 | 0,15 | 0,81 | 0,84 |          |          |
| 27.10.07 | 1  | 1,0044983 | 0,0000012 | 20 | 8,2224  | TF0002 | 54 | 39   | 12 | 27    | 1 | 68,4 |      |       |      |      |      |      |      |          |          |
| 27.10.07 | 1  | 1,0044980 | 0,0000011 | 20 | 8,2215  | TF0002 | 54 | 39   | 12 | 27    | 1 | 68,9 |      |       |      |      |      |      |      |          |          |
| 27.10.07 | 1  | 1,0044965 | 0,0000005 | 20 | 8,2211  | TF0002 | 54 | 39   | 12 | 27    | 1 | 67,3 |      |       |      |      |      |      |      |          |          |
| 27.10.07 | 1  | 1,0044985 | 0,0000008 | 20 | 8,2215  | TF0002 | 54 | 39   | 12 | 27    | 1 | 69,5 |      |       |      |      |      |      |      |          |          |
| 27.10.07 | 1  | 1,0044965 | 0,0000008 | 20 | 8,2223  | TF0002 | 54 | 39   | 12 | 27    | 1 | 66,1 |      |       |      |      |      |      |      |          |          |
| 28.10.07 | 1  | 1,0042153 | 0,0000005 | 20 | 7,8487  | TF0113 | 54 | 55,5 | 13 | 30    | 1 | 68,2 |      |       | 10,3 | 0,37 | 0,04 | 0    | 0,25 |          |          |
| 28.10.07 | 1  | 1,0042147 | 0,0000010 | 20 | 7,8482  | TF0113 | 54 | 55,5 | 13 | 30    | 1 | 67,8 |      |       | 10,3 | 0,37 | 0,04 | 0    | 0,25 |          |          |
| 28.10.07 | 1  | 1,0042137 | 0,0000005 | 20 | 7,8480  | TF0113 | 54 | 55,5 | 13 | 30    | 1 | 66,6 |      |       | 10,3 | 0,37 | 0,04 | 0    | 0,25 |          |          |
| 28.10.07 | 42 | 1,0089577 | 0,0000010 | 20 | 14,1326 | TF0113 | 54 | 55,5 | 13 | 30    | 1 | 52,0 |      |       | 21   | 0,97 | 0,14 | 4,02 | 0,5  |          |          |
| 28.10.07 | 42 | 1,0089617 | 0,0000008 | 20 | 14,1271 | TF0113 | 54 | 55,5 | 13 | 30    | 1 | 62,7 |      |       | 21   | 0,97 | 0,14 | 4,02 | 0,5  |          |          |
| 28.10.07 | 42 | 1,0089615 | 0,0000008 | 20 | 14,1280 | TF0113 | 54 | 55,5 | 13 | 30    | 1 | 61,6 |      |       | 21   | 0,97 | 0,14 | 4,02 | 0,5  |          |          |
| 28.10.07 | 1  | 1,0042185 | 0,0000015 | 20 | 7,8485  | TF0113 | 54 | 55,5 | 13 | 30    | 1 | 72,6 |      |       | 10,3 | 0,37 | 0,04 | 0    | 0,25 |          |          |
| 28.10.07 | 1  | 1,0042152 | 0,0000008 | 20 | 7,8507  | TF0113 | 54 | 55,5 | 13 | 30    | 1 | 66,0 |      |       | 10,3 | 0,37 | 0,04 | 0    | 0,25 |          |          |
| 28.10.07 | 1  | 1,0042148 | 0,0000019 | 20 | 7,8482  | TF0113 | 54 | 55,5 | 13 | 30    | 1 | 68,0 |      |       | 10,3 | 0,37 | 0,04 | 0    | 0,25 |          |          |
| 28.10.07 | 1  | 1,0092845 | 0,0000014 | 20 | 14,5498 | TF0113 | 54 | 55,5 | 13 | 30    | 1 | 66,7 |      |       | 10,3 | 0,37 | 0,04 | 0    | 0,25 |          |          |
| 28.10.07 | 1  | 1,0091373 | 0,0000012 | 20 | 14,3599 | TF0113 | 54 | 55,5 | 13 | 30    | 1 | 62,2 |      |       | 10,3 | 0,37 | 0,04 | 0    | 0,25 |          |          |

|          |    |           |           |    |         |        |    |      |    |      |   |      |      |      |      |      |      |
|----------|----|-----------|-----------|----|---------|--------|----|------|----|------|---|------|------|------|------|------|------|
| 28.10.07 | 1  | 1,0086448 | 0,0000012 | 20 | 13,7030 | TF0113 | 54 | 55,5 | 13 | 30   | 1 | 68,1 | 10,3 | 0,37 | 0,04 | 0    | 0,25 |
| 29.10.07 | 2  | 1,0037475 | 0,0000020 | 20 | 7,2308  | TF0213 | 55 | 15   | 15 | 59   | 1 | 68,0 | 10,5 | 0,31 | 0,17 | 0    | 0,24 |
| 29.10.07 | 2  | 1,0037473 | 0,0000018 | 20 | 7,2311  | TF0213 | 55 | 15   | 15 | 59   | 1 | 67,5 | 10,5 | 0,31 | 0,17 | 0    | 0,24 |
| 29.10.07 | 2  | 1,0037473 | 0,0000010 | 20 | 7,2303  | TF0213 | 55 | 15   | 15 | 59   | 1 | 68,3 | 10,5 | 0,31 | 0,17 | 0    | 0,24 |
| 29.10.07 | 50 | 1,0043593 | 0,0000012 | 20 | 8,0404  | TF0213 | 55 | 15   | 15 | 59   | 1 | 66,7 | 15,8 | 0,98 | 0,09 | 2,03 | 0,14 |
| 29.10.07 | 50 | 1,0043473 | 0,0000014 | 20 | 8,0242  | TF0213 | 55 | 15   | 15 | 59   | 1 | 67,1 | 15,8 | 0,98 | 0,09 | 2,03 | 0,14 |
| 29.10.07 | 50 | 1,0043727 | 0,0000012 | 20 | 8,0572  | TF0213 | 55 | 15   | 15 | 59   | 1 | 67,6 | 15,8 | 0,98 | 0,09 | 2,03 | 0,14 |
| 29.10.07 | 2  | 1,0037507 | 0,0000012 | 20 | 7,2343  | TF0213 | 55 | 15   | 15 | 59   | 1 | 68,7 | 10,5 | 0,31 | 0,17 | 0    | 0,24 |
| 29.10.07 | 2  | 1,0037482 | 0,0000013 | 20 | 7,2310  | TF0213 | 55 | 15   | 15 | 59   | 1 | 68,7 | 10,5 | 0,31 | 0,17 | 0    | 0,24 |
| 29.10.07 | 50 | 1,0043480 | 0,0000005 | 20 | 8,0261  | TF0213 | 55 | 15   | 15 | 59   | 1 | 66,1 | 15,8 | 0,98 | 0,09 | 2,03 | 0,14 |
| 29.10.07 | 50 | 1,0043465 | 0,0000008 | 20 | 8,0235  | TF0213 | 55 | 15   | 15 | 59   | 1 | 66,7 | 15,8 | 0,98 | 0,09 | 2,03 | 0,14 |
| 29.10.07 | 50 | 1,0043727 | 0,0000005 | 20 | 8,0585  | TF0213 | 55 | 15   | 15 | 59   | 1 | 66,3 | 15,8 | 0,98 | 0,09 | 2,03 | 0,14 |
| 29.10.07 | 2  | 1,0038877 | 0,0000006 | 20 | 7,4170  | TF0256 | 55 | 15   | 15 | 59   | 1 | 67,0 | 6,2  | 0,25 | 0,23 | 0,41 |      |
| 29.10.07 | 2  | 1,0038895 | 0,0000012 | 20 | 7,4164  | TF0256 | 55 | 19,6 | 18 | 14,1 | 1 | 70,1 | 6,2  | 0,25 | 0,23 | 0,41 |      |
| 29.10.07 | 2  | 1,0038895 | 0,0000019 | 20 | 7,4162  | TF0256 | 55 | 19,6 | 18 | 14,1 | 1 | 70,2 | 6,2  | 0,25 | 0,23 | 0,41 |      |
| 29.10.07 | 56 | 1,0041608 | 0,0000010 | 20 | 7,7720  | TF0256 | 55 | 19,6 | 18 | 14,1 | 1 | 72,9 | 7,6  | 0,32 | 0,25 | 0,94 |      |
| 29.10.07 | 56 | 1,0041580 | 0,0000014 | 20 | 7,7708  | TF0256 | 55 | 19,6 | 18 | 14,1 | 1 | 70,3 | 7,6  | 0,32 | 0,25 | 0,94 |      |
| 29.10.07 | 56 | 1,0041597 | 0,0000015 | 20 | 7,7718  | TF0256 | 55 | 19,6 | 18 | 14,1 | 1 | 71,5 | 7,6  | 0,32 | 0,25 | 0,94 |      |
| 29.10.07 | 2  | 1,0038907 | 0,0000010 | 20 | 7,4177  | TF0256 | 55 | 19,6 | 18 | 14,1 | 1 | 70,3 | 6,2  | 0,25 | 0,23 | 0,41 |      |
| 29.10.07 | 2  | 1,0038903 | 0,0000010 | 20 | 7,4168  | TF0256 | 55 | 19,6 | 18 | 14,1 | 1 | 70,7 | 6,2  | 0,25 | 0,23 | 0,41 |      |
| 29.10.07 | 2  | 1,0038937 | 0,0000012 | 20 | 7,4180  | TF0256 | 55 | 19,6 | 18 | 14,1 | 1 | 73,9 | 6,2  | 0,25 | 0,23 | 0,41 |      |
| 29.10.07 | 56 | 1,0041630 | 0,0000010 | 20 | 7,7754  | TF0256 | 55 | 19,6 | 18 | 14,1 | 1 | 72,4 | 7,6  | 0,32 | 0,25 | 0,94 |      |
| 29.10.07 | 56 | 1,0041685 | 0,0000015 | 20 | 7,7777  | TF0256 | 55 | 19,6 | 18 | 14,1 | 1 | 77,3 | 7,6  | 0,32 | 0,25 | 0,94 |      |
| 29.10.07 | 56 | 1,0041992 | 0,0000014 | 20 | 7,8227  | TF0256 | 55 | 19,6 | 18 | 14,1 | 1 | 72,8 | 7,6  | 0,32 | 0,25 | 0,94 |      |
| 30.10.07 | 1  | 1,0037170 | 0,0000015 | 20 | 7,1793  | TF0271 | 57 | 19,2 | 20 | 3    | 1 | 79,2 | 3    | 0,08 | 0,23 | 0,06 | 0,2  |
| 30.10.07 | 1  | 1,0037122 | 0,0000013 | 20 | 7,1780  | TF0271 | 57 | 19,2 | 20 | 3    | 1 | 74,2 | 3    | 0,08 | 0,23 | 0,06 | 0,2  |
| 30.10.07 | 1  | 1,0037103 | 0,0000006 | 20 | 7,1780  | TF0271 | 57 | 19,2 | 20 | 3    | 1 | 71,7 | 3    | 0,08 | 0,23 | 0,06 | 0,2  |
| 30.10.07 | 51 | 1,0040255 | 0,0000010 | 20 | 7,5941  | TF0271 | 57 | 19,2 | 20 | 3    | 1 | 72,0 | 13,2 | 0,67 | 0,11 | 2,2  | 0,18 |
| 30.10.07 | 51 | 1,0040245 | 0,0000010 | 20 | 7,5936  | TF0271 | 57 | 19,2 | 20 | 3    | 1 | 71,2 | 13,2 | 0,67 | 0,11 | 2,2  | 0,18 |
| 30.10.07 | 51 | 1,0040285 | 0,0000008 | 20 | 7,5947  | TF0271 | 57 | 19,2 | 20 | 3    | 1 | 75,3 | 13,2 | 0,67 | 0,11 | 2,2  | 0,18 |
| 30.10.07 | 1  | 1,0037103 | 0,0000019 | 20 | 7,1780  | TF0271 | 57 | 19,2 | 20 | 3    | 1 | 71,8 | 3    | 0,08 | 0,23 | 0,06 | 0,2  |
| 30.10.07 | 1  | 1,0037117 | 0,0000008 | 20 | 7,1802  | TF0271 | 57 | 19,2 | 20 | 3    | 1 | 71,2 | 3    | 0,08 | 0,23 | 0,06 | 0,2  |
| 30.10.07 | 1  | 1,0037127 | 0,0000008 | 20 | 7,1791  | TF0271 | 57 | 19,2 | 20 | 3    | 1 | 73,7 | 3    | 0,08 | 0,23 | 0,06 | 0,2  |
| 30.10.07 | 51 | 1,0040318 | 0,0000010 | 20 | 7,5954  | TF0271 | 57 | 19,2 | 20 | 3    | 1 | 79,1 | 13,2 | 0,67 | 0,11 | 2,2  | 0,18 |
| 30.10.07 | 51 | 1,0040305 | 0,0000008 | 20 | 7,5957  | TF0271 | 57 | 19,2 | 20 | 3    | 1 | 77,0 | 13,2 | 0,67 | 0,11 | 2,2  | 0,18 |
| 30.10.07 | 51 | 1,0040272 | 0,0000012 | 20 | 7,5962  | TF0271 | 57 | 19,2 | 20 | 3    | 1 | 72,1 | 13,2 | 0,67 | 0,11 | 2,2  | 0,18 |
| 28.3.08  | 1  | 1,0051537 | 0,0000009 | 20 | 9,0887  | TF0002 | 54 | 39   | 12 | 27   | 1 | 68,1 |      |      |      |      |      |
| 28.3.08  | 1  | 1,0051540 | 0,0000006 | 20 | 9,0880  | TF0002 | 54 | 39   | 12 | 27   | 1 | 69,3 |      |      |      |      |      |
| 28.3.08  | 1  | 1,0051580 | 0,0000006 | 20 | 9,0889  | TF0002 | 54 | 39   | 12 | 27   | 1 | 73,7 |      |      |      |      |      |
| 28.3.08  | 1  | 1,0051512 | 0,0000012 | 20 | 9,0889  | TF0002 | 54 | 39   | 12 | 27   | 1 | 64,7 |      |      |      |      |      |

|         |    |           |           |    |         |        |    |      |    |      |   |      |      |      |      |      |      |
|---------|----|-----------|-----------|----|---------|--------|----|------|----|------|---|------|------|------|------|------|------|
| 28.3.08 | 1  | 1,0044068 | 0,0000017 | 20 | 8,0984  | TF0113 | 54 | 55,5 | 13 | 30   | 1 | 71,5 | 14,4 | 0,61 | 0,12 | 0,87 |      |
| 28.3.08 | 1  | 1,0044027 | 0,0000012 | 20 | 8,0979  | TF0113 | 54 | 55,5 | 13 | 30   | 1 | 66,5 | 14,4 | 0,61 | 0,12 | 0,87 |      |
| 28.3.08 | 40 | 1,0080442 | 0,0000012 | 20 | 12,9129 | TF0113 | 54 | 55,5 | 13 | 30   | 1 | 64,4 | 15,1 | 0,72 | 0,56 | 4,61 | 0,97 |
| 28.3.08 | 40 | 1,0080387 | 0,0000020 | 20 | 12,9107 | TF0113 | 54 | 55,5 | 13 | 30   | 1 | 59,4 | 15,1 | 0,72 | 0,56 | 4,61 | 0,97 |
| 28.3.08 | 1  | 1,0044038 | 0,0000010 | 20 | 8,0983  | TF0113 | 54 | 55,5 | 13 | 30   | 1 | 67,7 | 14,4 | 0,61 | 0,12 | 0,87 |      |
| 28.3.08 | 40 | 1,0080383 | 0,0000005 | 20 | 12,9093 | TF0113 | 54 | 55,5 | 13 | 30   | 1 | 60,3 | 15,1 | 0,72 | 0,56 | 4,61 | 0,97 |
| 28.3.08 | 1  | 1,0043410 | 0,0000010 | 20 | 8,0120  | TF0113 | 54 | 55,5 | 13 | 30   | 1 | 70,9 | 14,4 | 0,61 | 0,12 | 0,87 |      |
| 28.3.08 | 1  | 1,0043405 | 0,0000012 | 20 | 8,0145  | TF0113 | 54 | 55,5 | 13 | 30   | 1 | 67,8 | 14,4 | 0,61 | 0,12 | 0,87 |      |
| 28.3.08 | 40 | 1,0079232 | 0,0000013 | 20 | 12,7567 | TF0113 | 54 | 55,5 | 13 | 30   | 1 | 60,6 | 15,1 | 0,72 | 0,56 | 4,61 | 0,97 |
| 28.3.08 | 40 | 1,0079073 | 0,0000000 | 20 | 12,7345 | TF0113 | 54 | 55,5 | 13 | 30   | 1 | 61,9 | 15,1 | 0,72 | 0,56 | 4,61 | 0,97 |
| 28.3.08 | 1  | 1,0043397 | 0,0000018 | 20 | 8,0158  | TF0113 | 54 | 55,5 | 13 | 30   | 1 | 65,3 | 14,4 | 0,61 | 0,12 | 0,87 |      |
| 28.3.08 | 1  | 1,0078920 | 0,0000010 | 20 | 12,7160 | TF0113 | 54 | 55,5 | 13 | 30   | 1 | 60,2 | 14,4 | 0,61 | 0,12 | 0,87 |      |
| 29.3.08 | 2  | 1,0040555 | 0,0000005 | 20 | 7,6371  | TF0213 | 55 | 15   | 15 | 59   | 1 | 68,6 | 16,4 | 0,55 | 0,07 | 0,05 | 0,2  |
| 29.3.08 | 2  | 1,0040547 | 0,0000015 | 20 | 7,6361  | TF0213 | 55 | 15   | 15 | 59   | 1 | 68,5 | 16,4 | 0,55 | 0,07 | 0,05 | 0,2  |
| 29.3.08 | 50 | 1,0058658 | 0,0000014 | 20 | 10,0286 | TF0213 | 55 | 15   | 15 | 59   | 1 | 69,5 | 31   | 1,63 | 0,08 | 6,99 | 0,13 |
| 29.3.08 | 50 | 1,0058712 | 0,0000008 | 20 | 10,0274 | TF0213 | 55 | 15   | 15 | 59   | 1 | 77,7 | 31   | 1,63 | 0,08 | 6,99 | 0,13 |
| 29.3.08 | 2  | 1,0040547 | 0,0000037 | 20 | 7,6406  | TF0213 | 55 | 15   | 15 | 59   | 1 | 64,0 | 16,4 | 0,55 | 0,07 | 0,05 | 0,2  |
| 29.3.08 | 50 | 1,0058558 | 0,0000017 | 20 | 10,0199 | TF0213 | 55 | 15   | 15 | 59   | 1 | 64,9 | 31   | 1,63 | 0,08 | 6,99 | 0,13 |
| 29.3.08 | 2  | 1,0039355 | 0,0000015 | 20 | 7,4796  | TF0213 | 55 | 15   | 15 | 59   | 1 | 67,6 | 16,4 | 0,55 | 0,07 | 0,05 | 0,2  |
| 29.3.08 | 2  | 1,0039373 | 0,0000014 | 20 | 7,4796  | TF0213 | 55 | 15   | 15 | 59   | 1 | 70,0 | 16,4 | 0,55 | 0,07 | 0,05 | 0,2  |
| 29.3.08 | 50 | 1,0063093 | 0,0000014 | 20 | 10,6175 | TF0213 | 55 | 15   | 15 | 59   | 1 | 66,8 | 31   | 1,63 | 0,08 | 6,99 | 0,13 |
| 29.3.08 | 50 | 1,0063023 | 0,0000012 | 20 | 10,6085 | TF0213 | 55 | 15   | 15 | 59   | 1 | 66,6 | 31   | 1,63 | 0,08 | 6,99 | 0,13 |
| 29.3.08 | 2  | 1,0039390 | 0,0000010 | 20 | 7,4837  | TF0213 | 55 | 15   | 15 | 59   | 1 | 68,1 | 16,4 | 0,55 | 0,07 | 0,05 | 0,2  |
| 29.3.08 | 50 | 1,0062817 | 0,0000008 | 20 | 10,5839 | TF0213 | 55 | 15   | 15 | 59   | 1 | 63,8 | 31   | 1,63 | 0,08 | 6,99 | 0,13 |
| 30.3.08 | 2  | 1,0038735 | 0,0000008 | 20 | 7,3954  | TF0256 | 55 | 19,6 | 18 | 14,1 | 1 | 69,8 | 8,8  | 0,35 | 0,05 | 0,25 |      |
| 30.3.08 | 2  | 1,0038795 | 0,0000008 | 20 | 7,3996  | TF0256 | 55 | 19,6 | 18 | 14,1 | 1 | 73,6 | 8,8  | 0,35 | 0,05 | 0,25 |      |
| 30.3.08 | 50 | 1,0039982 | 0,0000016 | 20 | 7,5604  | TF0256 | 55 | 19,6 | 18 | 14,1 | 1 | 69,6 | 16,2 | 0,69 | 0,26 | 1,53 |      |
| 30.3.08 | 50 | 1,0040013 | 0,0000005 | 20 | 7,5630  | TF0256 | 55 | 19,6 | 18 | 14,1 | 1 | 71,1 | 16,2 | 0,69 | 0,26 | 1,53 |      |
| 30.3.08 | 2  | 1,0038727 | 0,0000005 | 20 | 7,3972  | TF0256 | 55 | 19,6 | 18 | 14,1 | 1 | 66,9 | 8,8  | 0,35 | 0,05 | 0,25 |      |
| 30.3.08 | 50 | 1,0039967 | 0,0000000 | 20 | 7,5614  | TF0256 | 55 | 19,6 | 18 | 14,1 | 1 | 66,6 | 16,2 | 0,69 | 0,26 | 1,53 |      |
| 2.4.08  | 2  | 1,0038873 | 0,0000012 | 20 | 7,4116  | TF0271 | 57 | 19,2 | 20 | 3    | 1 | 72,0 | 12,1 | 0,56 | 0,11 | 1,43 |      |
| 2.4.08  | 2  | 1,0038873 | 0,0000012 | 20 | 7,4114  | TF0271 | 57 | 19,2 | 20 | 3    | 1 | 72,1 | 12,1 | 0,56 | 0,11 | 1,43 |      |
| 2.4.08  | 50 | 1,0039057 | 0,0000013 | 20 | 7,4358  | TF0271 | 57 | 19,2 | 20 | 3    | 1 | 72,0 | 10,4 | 0,49 | 0,09 | 1,22 | 0,19 |
| 2.4.08  | 50 | 1,0039038 | 0,0000005 | 20 | 7,4356  | TF0271 | 57 | 19,2 | 20 | 3    | 1 | 69,7 | 10,4 | 0,49 | 0,09 | 1,22 | 0,19 |
| 2.4.08  | 2  | 1,0038962 | 0,0000015 | 20 | 7,4262  | TF0271 | 57 | 19,2 | 20 | 3    | 1 | 69,0 | 12,1 | 0,56 | 0,11 | 1,43 |      |
| 2.4.08  | 50 | 1,0039053 | 0,0000005 | 20 | 7,4376  | TF0271 | 57 | 19,2 | 20 | 3    | 1 | 69,7 | 10,4 | 0,49 | 0,09 | 1,22 | 0,19 |
| 3.4.08  | 1  | 1,0033955 | 0,0000004 | 20 | 6,7653  | TF0284 | 58 | 35   | 18 | 14   | 1 | 68,5 | 8,3  | 0,3  | 0,01 | 0,08 | 0,29 |
| 3.4.08  | 1  | 1,0033935 | 0,0000010 | 20 | 6,7648  | TF0284 | 58 | 35   | 18 | 14   | 1 | 66,4 | 8,3  | 0,3  | 0,01 | 0,08 | 0,29 |
| 3.4.08  | 50 | 1,0036195 | 0,0000014 | 20 | 7,0585  | TF0284 | 58 | 35   | 18 | 14   | 1 | 71,2 | 11   | 0,48 | 0,06 | 2,49 | 0,31 |
| 3.4.08  | 50 | 1,0036162 | 0,0000014 | 20 | 7,0582  | TF0284 | 58 | 35   | 18 | 14   | 1 | 67,1 | 11   | 0,48 | 0,06 | 2,49 | 0,31 |

|         |    |           |           |    |         |        |    |      |    |      |   |      |      |      |      |      |      |          |
|---------|----|-----------|-----------|----|---------|--------|----|------|----|------|---|------|------|------|------|------|------|----------|
| 3.4.08  | 1  | 1,0033928 | 0,0000004 | 20 | 6,7663  | TF0284 | 58 | 35   | 18 | 14   | 1 | 64,0 | 8,3  | 0,3  | 0,01 | 0,08 | 0,29 |          |
| 3.4.08  | 50 | 1,0036168 | 0,0000008 | 20 | 7,0593  | TF0284 | 58 | 35   | 18 | 14   | 1 | 66,9 | 11   | 0,48 | 0,06 | 2,49 | 0,31 |          |
| 30.4.08 | 1  | 1,0044602 | 0,0000008 | 20 | 8,1738  | TF0002 | 54 | 39   | 12 | 27   | 1 | 66,6 |      |      |      |      |      | 1614,864 |
| 30.4.08 | 1  | 1,0044670 | 0,0000009 | 20 | 8,1765  | TF0002 | 54 | 39   | 12 | 27   | 1 | 72,9 |      |      |      |      |      | 1614,864 |
| 30.4.08 | 1  | 1,0044593 | 0,0000006 | 20 | 8,1735  | TF0002 | 54 | 39   | 12 | 27   | 1 | 65,8 |      |      |      |      |      | 1614,864 |
| 1.5.08  | 1  | 1,0043262 | 0,0000013 | 20 | 7,9923  | TF0113 | 54 | 55,5 | 13 | 30   | 1 | 71,0 | 11,1 | 0,25 | 0,01 | 0    | 0,15 | 1590,184 |
| 1.5.08  | 1  | 1,0043250 | 0,0000010 | 20 | 7,9920  | TF0113 | 54 | 55,5 | 13 | 30   | 1 | 69,8 | 11,1 | 0,25 | 0,01 | 0    | 0,15 | 1590,184 |
| 1.5.08  | 40 | 1,0098467 | 0,0000010 | 20 | 15,2901 | TF0113 | 54 | 55,5 | 13 | 30   | 1 | 69,2 | 18,7 | 0,93 | 0,14 | 3,65 | 0,77 | 1844,172 |
| 1.5.08  | 40 | 1,0097207 | 0,0000008 | 20 | 15,1277 | TF0113 | 54 | 55,5 | 13 | 30   | 1 | 65,1 | 18,7 | 0,93 | 0,14 | 3,65 | 0,77 | 1844,172 |
| 1.5.08  | 1  | 1,0043247 | 0,0000006 | 20 | 7,9939  | TF0113 | 54 | 55,5 | 13 | 30   | 1 | 67,4 | 11,1 | 0,25 | 0,01 | 0    | 0,15 | 1590,184 |
| 1.5.08  | 40 | 1,0096043 | 0,0000008 | 20 | 14,9809 | TF0113 | 54 | 55,5 | 13 | 30   | 1 | 58,2 | 18,7 | 0,93 | 0,14 | 3,65 | 0,77 | 1844,172 |
| 1.5.08  | 51 | 1,0047398 | 0,0000010 | 20 | 8,5395  | TF0213 | 55 | 15   | 15 | 59   | 1 | 70,4 | 17,7 | 0,89 | 0,14 | 1,88 | 0,61 | 1594,567 |
| 1.5.08  | 51 | 1,0047335 | 0,0000005 | 20 | 8,5305  | TF0213 | 55 | 15   | 15 | 59   | 1 | 71,1 | 17,7 | 0,89 | 0,14 | 1,88 | 0,61 | 1594,567 |
| 1.5.08  | 2  | 1,0039910 | 0,0000000 | 20 | 7,5478  | TF0213 | 55 | 15   | 15 | 59   | 1 | 72,7 | 15,8 | 0,29 | 0,02 | 0,04 | 0,38 | 1676,974 |
| 1.5.08  | 2  | 1,0039892 | 0,0000008 | 20 | 7,5480  | TF0213 | 55 | 15   | 15 | 59   | 1 | 70,1 | 15,8 | 0,29 | 0,02 | 0,04 | 0,38 | 1676,974 |
| 1.5.08  | 51 | 1,0047178 | 0,0000019 | 20 | 8,5190  | TF0213 | 55 | 15   | 15 | 59   | 1 | 61,9 | 17,7 | 0,89 | 0,14 | 1,88 | 0,61 | 1594,567 |
| 1.5.08  | 2  | 1,0039903 | 0,0000006 | 20 | 7,5510  | TF0213 | 55 | 15   | 15 | 59   | 1 | 68,6 | 15,8 | 0,29 | 0,02 | 0,04 | 0,38 | 1676,974 |
| 2.5.08  | 2  | 1,0038765 | 0,0000008 | 20 | 7,3971  | TF0256 | 55 | 19,6 | 18 | 14,1 | 1 | 72,2 | 13,6 | 0,26 | 0,01 | 0,05 |      |          |
| 2.5.08  | 2  | 1,0038763 | 0,0000010 | 20 | 7,3974  | TF0256 | 55 | 19,6 | 18 | 14,1 | 1 | 71,6 | 13,6 | 0,26 | 0,01 | 0,05 |      |          |
| 2.5.08  | 50 | 1,0038913 | 0,0000012 | 20 | 7,4162  | TF0256 | 55 | 19,6 | 18 | 14,1 | 1 | 72,6 | 13,5 | 0,48 | 0,05 | 0,23 |      | 1609,020 |
| 2.5.08  | 50 | 1,0038905 | 0,0000008 | 20 | 7,4170  | TF0256 | 55 | 19,6 | 18 | 14,1 | 1 | 70,7 | 13,5 | 0,48 | 0,05 | 0,23 |      | 1609,020 |
| 2.5.08  | 2  | 1,0038732 | 0,0000008 | 20 | 7,3986  | TF0256 | 55 | 19,6 | 18 | 14,1 | 1 | 66,3 | 13,6 | 0,26 | 0,01 | 0,05 |      |          |
| 2.5.08  | 50 | 1,0038890 | 0,0000005 | 20 | 7,3986  | TF0256 | 55 | 19,6 | 18 | 14,1 | 1 | 87,2 | 13,5 | 0,48 | 0,05 | 0,23 |      | 1609,020 |
| 3.5.08  | 1  | 1,0038093 | 0,0000012 | 20 | 7,3054  | TF0271 | 57 | 19,2 | 20 | 3    | 1 | 75,1 | 11,1 | 0,05 | 0,02 | 0,11 | 0,28 | 1509,927 |
| 3.5.08  | 1  | 1,0038092 | 0,0000010 | 20 | 7,3059  | TF0271 | 57 | 19,2 | 20 | 3    | 1 | 74,3 | 11,1 | 0,05 | 0,02 | 0,11 | 0,28 | 1509,927 |
| 3.5.08  | 50 | 1,0038790 | 0,0000012 | 20 | 7,4007  | TF0271 | 57 | 19,2 | 20 | 3    | 1 | 71,8 | 13,3 | 0,43 | 0,03 | 0,05 | 0,3  | 1612,754 |
| 3.5.08  | 50 | 1,0038788 | 0,0000016 | 20 | 7,4020  | TF0271 | 57 | 19,2 | 20 | 3    | 1 | 70,3 | 13,3 | 0,43 | 0,03 | 0,05 | 0,3  | 1612,754 |
| 3.5.08  | 1  | 1,0038087 | 0,0000006 | 20 | 7,3061  | TF0271 | 57 | 19,2 | 20 | 3    | 1 | 73,5 | 11,1 | 0,05 | 0,02 | 0,11 | 0,28 | 1509,927 |
| 3.5.08  | 50 | 1,0038760 | 0,0000006 | 20 | 7,4014  | TF0271 | 57 | 19,2 | 20 | 3    | 1 | 67,2 | 13,3 | 0,43 | 0,03 | 0,05 | 0,3  | 1612,754 |
| 4.5.08  | 2  | 1,0030092 | 0,0000019 | 20 | 6,2567  | TF0284 | 58 | 35   | 18 | 14   | 1 | 66,9 | 6,1  | 0,11 | 0,02 | 0,03 | 0,27 |          |
| 4.5.08  | 2  | 1,0030090 | 0,0000010 | 20 | 6,2571  | TF0284 | 58 | 35   | 18 | 14   | 1 | 66,4 | 6,1  | 0,11 | 0,02 | 0,03 | 0,27 |          |
| 4.5.08  | 50 | 1,0037630 | 0,0000008 | 20 | 7,2420  | TF0284 | 58 | 35   | 18 | 14   | 1 | 77,3 | 14   | 0,53 | 0,05 | 0,62 | 0,35 | 1613,466 |
| 4.5.08  | 50 | 1,0037605 | 0,0000008 | 20 | 7,2463  | TF0284 | 58 | 35   | 18 | 14   | 1 | 69,7 | 14   | 0,53 | 0,05 | 0,62 | 0,35 | 1613,466 |
| 4.5.08  | 50 | 1,0037588 | 0,0000012 | 20 | 7,2458  | TF0284 | 58 | 35   | 18 | 14   | 1 | 68,0 | 14   | 0,53 | 0,05 | 0,62 | 0,35 | 1613,466 |
| 4.5.08  | 2  | 1,0030065 | 0,0000012 | 20 | 6,2558  | TF0284 | 58 | 35   | 18 | 14   | 1 | 64,4 | 6,1  | 0,11 | 0,02 | 0,03 | 0,27 |          |
| 30.7.08 | 2  | 1,0044393 | 0,0000012 | 20 | 8,1426  | TF0002 | 54 | 39   | 12 | 27   | 1 | 70,3 |      |      |      |      |      |          |
| 30.7.08 | 2  | 1,0044398 | 0,0000012 | 20 | 8,1426  | TF0002 | 54 | 39   | 12 | 27   | 1 | 70,9 |      |      |      |      |      |          |
| 30.7.08 | 2  | 1,0044403 | 0,0000009 | 20 | 8,1431  | TF0002 | 54 | 39   | 12 | 27   | 1 | 71,1 |      |      |      |      |      |          |
| 1.8.08  | 1  | 1,0038083 | 0,0000008 | 20 | 7,3054  | TF0256 | 55 | 19,6 | 18 | 14,1 | 1 | 73,7 | 11,6 | 0    | 0    | 0    |      |          |
| 1.8.08  | 1  | 1,0038083 | 0,0000008 | 20 | 7,3048  | TF0256 | 55 | 19,6 | 18 | 14,1 | 1 | 74,4 | 11,6 | 0    | 0    | 0    |      |          |



|          |    |           |           |    |         |         |    |      |    |       |   |      |      |      |      |      |               |
|----------|----|-----------|-----------|----|---------|---------|----|------|----|-------|---|------|------|------|------|------|---------------|
| 1.8.08   | 1  | 1,0038090 | 0,0000008 | 20 | 7,3038  | TF0256  | 55 | 19,6 | 18 | 14,1  | 1 | 76,3 | 11,6 | 0    | 0    | 0    |               |
| 1.8.08   | 50 | 1,0039043 | 0,0000018 | 20 | 7,4325  | TF0256  | 55 | 19,6 | 18 | 14,1  | 1 | 73,5 | 13,8 | 0,57 | 0,22 | 0,05 |               |
| 1.8.08   | 50 | 1,0039027 | 0,0000009 | 20 | 7,4313  | TF0256  | 55 | 19,6 | 18 | 14,1  | 1 | 72,5 | 13,8 | 0,57 | 0,22 | 0,05 |               |
| 1.8.08   | 50 | 1,0038997 | 0,0000005 | 20 | 7,4313  | TF0256  | 55 | 19,6 | 18 | 14,1  | 1 | 68,5 | 13,8 | 0,57 | 0,22 | 0,05 |               |
| 2.8.08   | 1  | 1,0033560 | 0,0000049 | 20 | 6,7144  | TF0271  | 57 | 19,2 | 20 | 3     | 1 | 67,3 | 7,4  | 0,02 | 0,01 | 0    | 0,22          |
| 2.8.08   | 1  | 1,0033565 | 0,0000013 | 20 | 6,7141  | TF0271  | 57 | 19,2 | 20 | 3     | 1 | 68,3 | 7,4  | 0,02 | 0,01 | 0    |               |
| 2.8.08   | 1  | 1,0033592 | 0,0000008 | 20 | 6,7139  | TF0271  | 57 | 19,2 | 20 | 3     | 1 | 72,0 | 7,4  | 0,02 | 0,01 | 0    |               |
| 2.8.08   | 52 | 1,0038895 | 0,0000010 | 20 | 7,4163  | TF0271  | 57 | 19,2 | 20 | 3     | 1 | 70,1 | 12,3 | 0,44 | 0,28 | 0,19 | 0,39          |
| 2.8.08   | 52 | 1,0039040 | 0,0000012 | 20 | 7,4190  | TF0271  | 57 | 19,2 | 20 | 3     | 1 | 86,6 | 12,3 | 0,44 | 0,28 | 0,19 |               |
| 2.8.08   | 52 | 1,0038890 | 0,0000005 | 20 | 7,4147  | TF0271  | 57 | 19,2 | 20 | 3     | 1 | 71,0 | 12,3 | 0,44 | 0,28 | 0,19 |               |
| 3.8.08   | 1  | 1,0030700 | 0,0000012 | 20 | 6,3361  | TF0284  | 58 | 35   | 18 | 14    | 1 | 67,9 | 6,6  | 0,01 | 0    | 0    | 0,37          |
| 3.8.08   | 1  | 1,0030670 | 0,0000008 | 20 | 6,3353  | TF0284  | 58 | 35   | 18 | 14    | 1 | 64,7 | 6,6  | 0,01 | 0    | 0    | 0,37          |
| 3.8.08   | 1  | 1,0030678 | 0,0000010 | 20 | 6,3366  | TF0284  | 58 | 35   | 18 | 14    | 1 | 64,5 | 6,6  | 0,01 | 0    | 0    | 0,37          |
| 3.8.08   | 50 | 1,0038242 | 0,0000008 | 20 | 7,3288  | TF0284  | 58 | 35   | 18 | 14    | 1 | 71,3 | 14,4 | 0,59 | 0,35 | 0,43 | 0,36          |
| 3.8.08   | 50 | 1,0038305 | 0,0000012 | 20 | 7,3329  | TF0284  | 58 | 35   | 18 | 14    | 1 | 75,6 | 14,4 | 0,59 | 0,35 | 0,43 | 0,36          |
| 3.8.08   | 50 | 1,0038238 | 0,0000010 | 20 | 7,3291  | TF0284  | 58 | 35   | 18 | 14    | 1 | 70,5 | 14,4 | 0,59 | 0,35 | 0,43 | 0,36          |
| 16.11.08 | 1  | 1,0115377 | 0,0000012 | 20 | 17,5412 | TF0361  |    |      |    |       |   | 51,8 | 14,6 | 0,71 | 0,21 | 1,62 | 1,59          |
| 16.11.08 | 1  | 1,0115437 | 0,0000065 | 20 | 17,5441 | TF0361  |    |      |    |       |   | 57,0 | 14,6 | 0,71 | 0,21 | 1,62 | 1,59          |
| 16.11.08 | 1  | 1,0115409 | 0,0000047 | 20 | 17,5439 | TF0361  |    |      |    |       |   | 53,4 | 14,6 | 0,71 | 0,21 | 1,62 | 1,59          |
| 16.11.08 | 2  | 1,0087940 | 0,0000006 | 20 | 13,9115 | TF0002  | 54 | 39   | 12 | 27    | 1 | 56,8 |      |      |      |      | 1775,479      |
| 16.11.08 | 2  | 1,0087942 | 0,0000010 | 20 | 13,9109 | TF0002  | 54 | 39   | 12 | 27    | 1 | 57,6 |      |      |      |      | 1775,479      |
| 16.11.08 | 2  | 1,0087920 | 0,0000024 | 20 | 13,9108 | TF0002  | 54 | 39   | 12 | 27    | 1 | 54,9 |      |      |      |      | 1775,479      |
| 17.11.08 | 1  | 1,0046343 | 0,0000006 | 20 | 8,3990  | TF0113  | 54 | 55,5 | 13 | 30    | 1 | 71,5 | 10,5 | 0,37 | 0,13 | 0    | 1642,539      |
| 17.11.08 | 1  | 1,0046297 | 0,0000010 | 20 | 8,3987  | TF0113  | 54 | 55,5 | 13 | 30    | 1 | 65,7 | 10,5 | 0,37 | 0,13 | 0    | 1642,539      |
| 17.11.08 | 1  | 1,0046283 | 0,0000008 | 20 | 8,3994  | TF0113  | 54 | 55,5 | 13 | 30    | 1 | 63,2 | 10,5 | 0,37 | 0,13 | 0    | 1642,539      |
| 17.11.08 | 46 | 1,0117213 | 0,0000014 | 20 | 17,7868 | TF0113  | 54 | 55,5 | 13 | 30    | 1 | 48,8 | 24,3 | 1,15 | 0,08 | 7,24 | 0,09 1845,732 |
| 17.11.08 | 46 | 1,0117220 | 0,0000013 | 20 | 17,7866 | TF0113  | 54 | 55,5 | 13 | 30    | 1 | 49,9 | 24,3 | 1,15 | 0,08 | 7,24 | 0,09 1845,732 |
| 17.11.08 | 46 | 1,0117205 | 0,0000015 | 20 | 17,7868 | TF0113  | 54 | 55,5 | 13 | 30    | 1 | 47,7 | 24,3 | 1,15 | 0,08 | 7,24 | 0,09 1845,732 |
| 21.11.08 | 2  | 1,0040453 | 0,0000012 | 20 | 7,6247  | TF0213  | 55 | 15   | 15 | 59    | 1 | 67,6 | 7    | 0,43 | 0,32 | 1    | 0,22 1633,780 |
| 21.11.08 | 2  | 1,0040443 | 0,0000006 | 20 | 7,6247  | TF0213  | 55 | 15   | 15 | 59    | 1 | 66,2 | 7    | 0,43 | 0,32 | 1    | 0,22 1633,780 |
| 21.11.08 | 2  | 1,0040473 | 0,0000008 | 20 | 7,6279  | TF0213  | 55 | 15   | 15 | 59    | 1 | 67,1 | 7    | 0,43 | 0,32 | 1    | 0,22 1633,780 |
| 21.11.08 | 50 | 1,0060897 | 0,0000010 | 20 | 10,3282 | TF0213  | 55 | 15   | 15 | 59    | 1 | 65,7 | 30   | 1,64 | 0,07 | 7,37 | 0,08 1857,375 |
| 21.11.08 | 50 | 1,0060827 | 0,0000005 | 20 | 10,3209 | TF0213  | 55 | 15   | 15 | 59    | 1 | 63,7 | 30   | 1,64 | 0,07 | 7,37 | 0,08 1857,375 |
| 21.11.08 | 50 | 1,0060538 | 0,0000012 | 20 | 10,2839 | TF0213  | 55 | 15   | 15 | 59    | 1 | 62,6 | 30   | 1,64 | 0,07 | 7,37 | 0,08 1857,375 |
| 25.11.08 | 1  | 1,0050997 | 0,0000009 | 20 | 9,0164  | ABBoje  | 54 | 53   | 13 | 50,73 | 1 | 69,1 |      |      |      |      |               |
| 25.11.08 | 1  | 1,0050997 | 0,0000010 | 20 | 9,0154  | ABBoje  | 54 | 53   | 13 | 50,73 | 1 | 70,1 |      |      |      |      |               |
| 25.11.08 | 1  | 1,0050997 | 0,0000011 | 20 | 9,0181  | ABBoje  | 54 | 53   | 13 | 50,73 | 1 | 67,4 |      |      |      |      |               |
| 30.11.08 | 2  | 1,0036992 | 0,0000008 | 20 | 7,1591  | Ferry18 | 57 | 45,3 | 20 | 12,19 | 1 | 75,9 |      |      |      |      |               |
| 30.11.08 | 2  | 1,0019668 | 0,0000012 | 20 | 4,8831  | Ferry16 | 54 | 32,1 | 12 | 15,87 | 1 | 64,5 |      |      |      |      |               |
| 30.11.08 | 2  | 1,0043125 | 0,0000008 | 20 | 7,9694  | Ferry17 | 55 | 26,6 | 16 | 14,79 | 1 | 75,9 |      |      |      |      |               |

|          |    |           |           |    |        |         |    |      |    |       |   |      |          |
|----------|----|-----------|-----------|----|--------|---------|----|------|----|-------|---|------|----------|
| 30.11.08 | 2  | 1,0026613 | 0,0000005 | 20 | 5,7794 | Ferry7  | 57 | 45,3 | 20 | 12,19 | 1 | 84,9 |          |
| 30.11.08 | 2  | 0,9983942 | 0,0000012 | 20 | 0,2023 | Ferry2  |    |      |    |       |   | 44,4 |          |
| 30.11.08 | 2  | 0,9984132 | 0,0000015 | 20 | 0,2263 | Ferry3  |    |      |    |       |   | 45,2 |          |
| 30.11.08 | 2  | 1,0026192 | 0,0000015 | 20 | 5,7367 | Ferry20 | 59 | 51,2 | 25 | 12,2  | 1 | 71,9 |          |
| 30.11.08 | 2  | 1,0023163 | 0,0000010 | 20 | 5,3398 | Ferry19 | 59 | 59   | 26 | 45,66 | 1 | 69,1 |          |
| 30.11.08 | 2  | 1,0034607 | 0,0000044 | 20 | 6,8496 | Ferry12 | 59 | 10,1 | 22 | 1,87  | 1 | 70,3 |          |
| 31.1.09  | 2  | 1,0049483 | 0,0000006 | 20 | 8,8170 | TF0002  | 54 | 39   | 12 | 27    | 1 | 68,5 | 1662,953 |
| 31.1.09  | 3  | 1,0046613 | 0,0000011 | 20 | 8,4357 | TF0113  | 54 | 55,5 | 13 | 30    | 1 | 70,5 | 1653,582 |
| 31.1.09  | 3  | 1,0046840 | 0,0000012 | 20 | 8,4690 | TF0113  | 54 | 55,5 | 13 | 30    | 1 | 67,2 | 1653,582 |
| 31.1.09  | 40 | 1,0053577 | 0,0000006 | 20 | 9,3603 | TF0113  | 54 | 55,5 | 13 | 30    | 1 | 66,1 | 1682,881 |
| 31.1.09  | 40 | 1,0053613 | 0,0000005 | 20 | 9,3627 | TF0113  | 54 | 55,5 | 13 | 30    | 1 | 68,6 | 1682,881 |
| 31.1.09  | 40 | 1,0053623 | 0,0000012 | 20 | 9,3669 | TF0113  | 54 | 55,5 | 13 | 30    | 1 | 65,7 | 1682,881 |
| 1.2.09   | 3  | 1,0041570 | 0,0000009 | 20 | 7,7628 | TF0213  | 55 | 15   | 15 | 59    | 1 | 77,0 | 1630,381 |
| 4.2.09   | 3  | 1,0041520 | 0,0000009 | 20 | 7,7613 | TF0213  | 55 | 15   | 15 | 59    | 1 | 71,9 | 1630,381 |
| 4.2.09   | 3  | 1,0041575 | 0,0000010 | 20 | 7,7694 | TF0213  | 55 | 15   | 15 | 59    | 1 | 71,0 | 1630,381 |
| 4.2.09   | 50 | 1,0041646 | 0,0000017 | 20 | 7,7742 | TF0213  | 55 | 15   | 15 | 59    | 1 | 75,6 | 1628,973 |
| 4.2.09   | 50 | 1,0041628 | 0,0000005 | 20 | 7,7769 | TF0213  | 55 | 15   | 15 | 59    | 1 | 70,6 | 1628,973 |
| 4.2.09   | 50 | 1,0041635 | 0,0000004 | 20 | 7,7804 | TF0213  | 55 | 15   | 15 | 59    | 1 | 68,1 | 1628,973 |
| 4.2.09   | 2  | 1,0040118 | 0,0000021 | 20 | 7,5884 | TF0256  | 55 | 19,6 | 18 | 14,1  | 1 | 59,6 | 1632,166 |
| 4.2.09   | 2  | 1,0040240 | 0,0000010 | 20 | 7,5904 | TF0256  | 55 | 19,6 | 18 | 14,1  | 1 | 73,7 | 1632,166 |
| 4.2.09   | 50 | 1,0040313 | 0,0000009 | 20 | 7,6054 | TF0256  | 55 | 19,6 | 18 | 14,1  | 1 | 68,4 | 1630,728 |
| 4.2.09   | 50 | 1,0040333 | 0,0000009 | 20 | 7,6061 | TF0256  | 55 | 19,6 | 18 | 14,1  | 1 | 70,4 | 1630,728 |
| 4.2.09   | 50 | 1,0040347 | 0,0000008 | 20 | 7,6049 | TF0256  | 55 | 19,6 | 18 | 14,1  | 1 | 73,3 | 1630,728 |
| 8.2.09   | 2  | 1,0037015 | 0,0000008 | 20 | 7,1656 | TF0271  | 57 | 19,2 | 20 | 3     | 1 | 72,4 | 1617,368 |
| 8.2.09   | 2  | 1,0036963 | 0,0000019 | 20 | 7,1660 | TF0271  | 57 | 19,2 | 20 | 3     | 1 | 65,3 | 1617,368 |
| 8.2.09   | 2  | 1,0036972 | 0,0000004 | 20 | 7,1668 | TF0271  | 57 | 19,2 | 20 | 3     | 1 | 65,5 | 1617,368 |
| 8.2.09   | 50 | 1,0038320 | 0,0000015 | 20 | 7,3403 | TF0271  | 57 | 19,2 | 20 | 3     | 1 | 70,1 | 1623,742 |
| 8.2.09   | 50 | 1,0038312 | 0,0000012 | 20 | 7,3393 | TF0271  | 57 | 19,2 | 20 | 3     | 1 | 70,0 | 1623,742 |
| 8.2.09   | 50 | 1,0038245 | 0,0000019 | 20 | 7,3405 | TF0271  | 57 | 19,2 | 20 | 3     | 1 | 60,1 | 1623,742 |
| 10.2.09  | 2  | 1,0035602 | 0,0000013 | 20 | 6,9833 | TF0284  | 58 | 35   | 18 | 14    | 1 | 68,0 | 1584,681 |
| 10.2.09  | 2  | 1,0035528 | 0,0000015 | 20 | 6,9848 | TF0284  | 58 | 35   | 18 | 14    | 1 | 56,9 | 1584,681 |
| 10.2.09  | 2  | 1,0035675 | 0,0000008 | 20 | 6,9864 | TF0284  | 58 | 35   | 18 | 14    | 1 | 74,6 | 1584,681 |
| 10.2.09  | 50 | 1,0035905 | 0,0000009 | 20 | 7,0228 | TF0284  | 58 | 35   | 18 | 14    | 1 | 68,6 | 1595,495 |
| 10.2.09  | 50 | 1,0035897 | 0,0000010 | 20 | 7,0228 | TF0284  | 58 | 35   | 18 | 14    | 1 | 67,5 | 1595,495 |
| 10.2.09  | 50 | 1,0035915 | 0,0000021 | 20 | 7,0226 | TF0284  | 58 | 35   | 18 | 14    | 1 | 70,1 | 1595,495 |
| 14.1.09  | 1  | 1,0022228 | 0,0000015 | 20 | 5,2188 | GF2     | 59 | 50,3 | 25 | 51,41 | 1 | 66,7 |          |
| 14.1.09  | 60 | 1,0026080 | 0,0000005 | 20 | 5,7335 | GF2     | 59 | 50,3 | 25 | 51,41 | 1 | 60,4 |          |
| 13.1.09  | 1  | 1,0013580 | 0,0000005 | 20 | 4,0826 | F41     | 60 | 7,04 | 28 | 3,55  | 1 | 61,9 |          |
| 13.1.09  | 60 | 1,0018337 | 0,0000010 | 20 | 4,7033 | F41     | 60 | 7,04 | 28 | 3,55  | 1 | 68,6 |          |
| 15.1.09  | 1  | 1,0027315 | 0,0000008 | 20 | 5,8890 | LL9     | 59 | 42   | 24 | 1,81  | 1 | 68,0 |          |

|         |     |           |           |    |         |          |    |      |    |       |   |      |
|---------|-----|-----------|-----------|----|---------|----------|----|------|----|-------|---|------|
| 15.1.09 | 60  | 1,0030820 | 0,0000011 | 20 | 6,3494  | LL9      | 59 | 42   | 24 | 1,81  | 1 | 70,4 |
| 22.1.09 | 1   | 1,0024977 | 0,0000008 | 20 | 5,5875  | SR5      | 61 | 5    | 19 | 35    | 1 | 60,8 |
| 20.1.09 | 60  | 1,0006023 | 0,0000010 | 20 | 3,0984  | F2       | 65 | 23   | 23 | 27,76 | 1 | 50,0 |
| 20.1.09 | 1   | 1,0005943 | 0,0000024 | 20 | 3,0955  | F2       | 65 | 23   | 23 | 27,76 | 1 | 42,4 |
| 20.1.09 | 1   | 1,0006152 | 0,0000008 | 20 | 3,1215  | RR3      | 64 | 56   | 22 | 20,76 | 1 | 43,8 |
| 20.1.09 | 60  | 1,0006322 | 0,0000014 | 20 | 3,1430  | RR3      | 64 | 56   | 22 | 20,76 | 1 | 44,7 |
| 21.1.09 | 1   | 1,0024688 | 0,0000010 | 20 | 5,5451  | F26      | 61 | 59   | 20 | 3,78  | 1 | 65,1 |
| 21.1.09 | 80  | 1,0029397 | 0,0000011 | 20 | 6,1674  | F26      | 61 | 59   | 20 | 3,78  | 1 | 64,4 |
| 30.1.09 | 1   | 1,0147470 | 0,0000005 | 20 | 21,7873 | Fladen   | 57 | 11,5 | 11 | 40    | 1 | 41,5 |
| 30.1.09 | 50  | 1,0244167 | 0,0000015 | 20 | 34,5490 | Fladen   | 57 | 11,5 | 11 | 40    | 1 | -1,4 |
| 5.3.09  | 2   | 1,0035790 | 0,0000012 | 20 | 7,0084  | MM8-3020 | 59 | 9,02 | 21 | 22,1  | 1 | 67,9 |
| 5.3.09  | 90  | 1,0059430 | 0,0000010 | 20 | 10,1267 | MM8-3020 | 59 | 9,02 | 21 | 22,1  | 1 | 73,4 |
| 6.3.09  | 2   | 1,0038335 | 0,0000012 | 20 | 7,3377  | MM8-3016 | 57 | 18,3 | 20 | 4,47  | 1 | 74,7 |
| 6.3.09  | 100 | 1,0064885 | 0,0000008 | 20 | 10,8544 | MM8-3016 | 57 | 18,3 | 20 | 4,47  | 1 | 66,7 |
| 6.3.09  | 2   | 1,0039160 | 0,0000008 | 20 | 7,4488  | MM8-3016 | 57 | 18,3 | 20 | 4,47  | 1 | 72,6 |
| 6.3.09  | 90  | 1,0063018 | 0,0000008 | 20 | 10,6022 | MM8-3016 | 57 | 18,3 | 20 | 4,47  | 1 | 72,2 |
| 8.3.09  | 81  | 1,0061322 | 0,0000004 | 20 | 10,3846 | MM8-3012 | 55 | 33   | 18 | 24,05 | 1 | 65,5 |
| 8.3.09  | 1   | 1,0039310 | 0,0000012 | 20 | 7,4694  | MM8-3012 | 55 | 33   | 18 | 24,05 | 1 | 71,9 |
| 8.3.09  | 2   | 1,0039628 | 0,0000012 | 20 | 7,5076  | MM8-3010 | 54 | 52   | 19 | 17,04 | 1 | 75,7 |
| 8.3.09  | 90  | 1,0069893 | 0,0000022 | 20 | 11,5152 | MM8-3010 | 54 | 52   | 19 | 17,04 | 1 | 67,8 |
| 9.3.09  | 2   | 1,0042242 | 0,0000014 | 20 | 7,8608  | MM8-3006 | 55 | 15   | 15 | 59,04 | 1 | 67,8 |
| 9.3.09  | 70  | 1,0093700 | 0,0000015 | 20 | 14,6659 | MM8-3006 | 55 | 15   | 15 | 59,04 | 1 | 63,6 |
| 9.3.09  | 42  | 1,0081333 | 0,0000008 | 20 | 13,0340 | MM8-3003 | 54 | 55,5 | 13 | 29,98 | 1 | 61,1 |
| 9.3.09  | 2   | 1,0041412 | 0,0000012 | 20 | 7,7523  | MM8-3003 | 54 | 55,5 | 13 | 29,98 | 1 | 66,7 |
| 23.2.09 | 1   | 1,0125178 | 0,0000010 | 20 | 18,8454 | MM8-3074 | 57 | 11,5 | 11 | 39,85 | 1 | 41,9 |
| 23.2.09 | 50  | 1,0245697 | 0,0000010 | 20 | 34,7559 | MM8-3074 | 57 | 11,5 | 11 | 39,85 | 1 | -7,7 |
| 23.2.09 | 26  | 1,0245070 | 0,0000012 | 20 | 34,6610 | MM8-3102 | 58 | 21,3 | 10 | 17,77 | 1 | 5,0  |
| 23.2.09 | 2   | 1,0186778 | 0,0000008 | 20 | 26,9756 | MM8-3102 | 58 | 21,3 | 10 | 17,77 | 1 | 32,4 |
| 24.2.09 | 2   | 1,0129585 | 0,0000010 | 20 | 19,4231 | MM8-3073 | 56 | 52,5 | 11 | 55,99 | 1 | 45,8 |
| 24.2.09 | 20  | 1,0236685 | 0,0000005 | 20 | 33,5550 | MM8-3073 | 56 | 52,5 | 11 | 55,99 | 1 | 11,3 |
| 24.2.09 | 15  | 1,0223800 | 0,0000005 | 20 | 31,8714 | MM8-3072 | 56 | 21,6 | 12 | 15,92 | 1 | 3,8  |
| 24.2.09 | 1   | 1,0124505 | 0,0000010 | 20 | 18,7535 | MM8-3072 | 56 | 21,6 | 12 | 15,92 | 1 | 44,9 |
| 27.2.09 | 113 | 1,0030232 | 0,0000017 | 20 | 6,2734  | MM8-3034 | 62 | 8,64 | 19 | 43,09 | 1 | 68,7 |
| 27.2.09 | 2   | 1,0023920 | 0,0000008 | 20 | 5,4508  | MM8-3034 | 62 | 8,64 | 19 | 43,09 | 1 | 58,0 |
| 28.2.09 | 2   | 1,0024648 | 0,0000033 | 20 | 5,5507  | MM8-3032 | 61 | 13,5 | 19 | 17,72 | 1 | 54,2 |
| 28.2.09 | 30  | 1,0024687 | 0,0000006 | 20 | 5,5515  | MM8-3032 | 61 | 13,5 | 19 | 17,72 | 1 | 58,4 |
| 28.2.09 | 55  | 1,0025085 | 0,0000008 | 20 | 5,6042  | MM8-3032 | 61 | 13,5 | 19 | 17,72 | 1 | 58,4 |
| 28.2.09 | 70  | 1,0027330 | 0,0000005 | 20 | 5,8926  | MM8-3032 | 61 | 13,5 | 19 | 17,72 | 1 | 66,4 |
| 4.3.09  | 1   | 1,0021252 | 0,0000008 | 20 | 5,0925  | MM8-3023 | 59 | 52   | 25 | 37,95 | 1 | 64,1 |
| 4.3.09  | 52  | 1,0044387 | 0,0000011 | 20 | 8,1378  | MM8-3023 | 59 | 52   | 25 | 37,95 | 1 | 74,2 |

|        |    |           |           |    |         |          |    |    |    |       |   |      |
|--------|----|-----------|-----------|----|---------|----------|----|----|----|-------|---|------|
| 4.3.09 | 2  | 1,0029055 | 0,0000015 | 20 | 6,1161  | MM8-3026 | 59 | 29 | 22 | 54,01 | 1 | 70,7 |
| 4.3.09 | 52 | 1,0039490 | 0,0000012 | 20 | 7,4928  | MM8-3026 | 59 | 29 | 22 | 54,01 | 1 | 72,2 |
| 4.3.09 | 80 | 1,0060205 | 0,0000010 | 20 | 10,2315 | MM8-3026 | 59 | 29 | 22 | 54,01 | 1 | 71,0 |
| 5.3.09 | 2  | 1,0030753 | 0,0000012 | 20 | 6,3416  | MM8-3028 | 59 | 30 | 21 | 0,036 | 1 | 69,4 |
| 5.3.09 | 54 | 1,0033887 | 0,0000016 | 20 | 6,7550  | MM8-3028 | 59 | 30 | 21 | 0,036 | 1 | 69,8 |
